1 **The landscape of DNA methylation associated with the**  
2 **transcriptomic network in laying hens and broilers get insight into**  
3 **embryonic muscle development in chicken**

4

5

6 Zihao Liu<sup>‡</sup>, Xiaoxu Shen<sup>‡</sup>, Shunshun Han<sup>‡</sup>, Yan Wang<sup>‡</sup>, Qing Zhu, Can  
7 Cui, Haorong He, Jing Zhao, Yuqi Chen, Yao Zhang, Lin Ye, Zhichao  
8 Zhang, Diyan Li, Xiaoling Zhao and Huadong Yin<sup>#</sup>

9

10 Farm Animal Genetic Resources Exploration and Innovation Key Laboratory of  
11 Sichuan Province, Sichuan Agricultural University, Chengdu, Sichuan 611130, PR  
12 China

13

14 <sup>‡</sup> These authors contributed equally to this work.

15

16 <sup>#</sup> Corresponding author:

17 **Huadong Yin**, Farm Animal Genetic Resources Exploration and Innovation Key  
18 Laboratory of Sichuan Province, Sichuan Agricultural University, Chengdu, Sichuan  
19 611130, PR China. E-mail: [yinhuadong@sicau.edu.cn](mailto:yinhuadong@sicau.edu.cn)

## 20 **Abstract**

21 As DNA methylation is one of the key epigenetic mechanisms  
22 involved in embryonic development, elucidating its relationship with  
23 non-coding RNA and genes is essential for understanding early  
24 development of life. In this study, we performed single-base-resolution  
25 bisulfite sequencing together with RNA-seq to explore the genetic basis  
26 of embryonic muscle development in chicken. Comparison of methylome  
27 profiles between broilers and layers revealed that lower methylation in  
28 broilers might contribute to the muscle development. Differential  
29 methylated region analysis between two chicken lines showed that the  
30 majority of DMRs were hypo-DMRs for broilers. Differential methylated  
31 genes were significantly enriched in muscle development related terms at  
32 E13 and E19. Furthermore, by constructing the network of the lncRNA,  
33 we identified a lncRNA named MYH1-AS that potentially regulated  
34 muscle development. These findings depicted an integrative landscape of  
35 late period of embryonic myogenesis in chicken and gave rise to a  
36 comprehensive understanding of epigenetic and transcriptional regulation  
37 in the skeletal muscle development. In addition, our study provided a  
38 reliable epigenetic resource for further muscle studies.

39

## 40 **Introduction**

41 Epigenetics including DNA methylation, histone modification,

42 non-coding RNAs and chromatin remodeling fascinate researchers in  
43 recent year because of their essential roles in various biological  
44 processes<sup>1,2</sup>. The functions of epigenetics have been reported in many  
45 aspects such as in human diseases<sup>3</sup>, oogenesis and spermatogenesis<sup>4</sup> as  
46 well as in adipose and muscle development<sup>5-7</sup>. DNA methylation is one of  
47 the epigenetic mechanisms that has been reported to exert considerable  
48 influence within regulation of the gene expression without changing the  
49 DNA methylation<sup>8</sup>. Its role in muscle development has been illustrated in  
50 human<sup>9</sup>, pig<sup>5,6</sup>, rabbit<sup>10</sup>, bovine<sup>11</sup> and chicken as well<sup>12</sup>.

51 Embryonic stage is crucial for mammal's muscle development as the  
52 number of muscle fiber keeps stable after birth. Therefore, it is interesting  
53 to study the embryonic muscle development from DNA methylation  
54 aspect. DNA methylation functioning in embryonic muscle development  
55 has been widely reported. For instance, ELVIRA CARRIO at el<sup>13</sup> built the  
56 methylome of myogenic stem cell and proved the importance of DNA  
57 methylation-mediated regulation of the cell-identity Myf5 super-enhancer  
58 during muscle-stem cell differentiation. Besides, lncRNAs were also  
59 proved to be important in regulation of muscle development for example,  
60 linc-MD1 interact with miR-133 and miR-135 to regulate the expression  
61 of transcription factors MAML1 and MEF2C that activate the  
62 muscle-specific gene expression<sup>7</sup>. Recently, the methylation and lncRNA  
63 regulatory relationship has drawn extensive attentions of researchers. A

64 database of methylation and lncRNA regulatory relationship has been  
65 built for human diseases studies<sup>14</sup>. In human, DNA methylation and  
66 lncRNA regulatory relationship were widely reported to be involve in  
67 tumorigenesis<sup>15-17</sup> whereas this regulatory relationship about muscle  
68 development is limited. The role of methylation in embryonic muscle  
69 development still remains unclear, although studies have been done in  
70 related field, such as Zhang et al<sup>5</sup> reported the regulatory relationship of  
71 lincRNA and DNA methylation functions in muscle development in pig.  
72 Yang et al<sup>6</sup> revealed that DNA methylation potentially affects gene  
73 expression in skeletal muscle to influence the propensity for obesity and  
74 body size.

75 The chicken is an ideal model for studying the embryogenesis and  
76 early muscle development because the accessibility of egg. Several  
77 genome-wide methylation studies have been reported in chicken.  
78 Basically, the relationship between DNA methylation level of promoter  
79 and expression level of genes were identified<sup>18-20</sup>. However, its role in  
80 chicken's embryonic muscle development has not been fully understood  
81 although global methylation landscape of muscle development was  
82 described in chicken using juvenile and later laying-period hens<sup>12</sup>. The  
83 ROSS 308 is one of the broilers bred and raised specifically  
84 for meat production whereas the Lohmann pink hen is a kind of layer  
85 bred and raised specifically for laying edible eggs. As they have

86 extremely different muscle accumulation and similar genetic background,  
87 they are good contrast model for muscle study. Here we used the whole  
88 genome bisulfite sequencing to produce the methylomes of 12 ROSS 308  
89 and 12 Lohmann pink hen. In order to explore the effect of methylation  
90 and lncRNAs relationship on muscle development, we sequenced the  
91 whole transcriptome of these 24 samples by RNA-seq simultaneously for  
92 the multi-Omics integrative analyses.

93

## 94 **Results**

### 95 **Overview of DNA Methylation**

96 For genomic methylation data among 24 samples, the average  
97 sequence depth is about 30.3X. Approximately 3.4 billion reads were  
98 generated by the Illumina HiSeq in total and an average of 71.99% clean  
99 reads were mapped to the *Gallus gallus* genome (version 5.0)  
100 (Supplementary Table S1). The coverage analysis revealed that  
101 approximately 82% of the *Gallus gallus* genome were covered by reads at  
102 least one-fold, whereas nearly 78% of genome were covered more than  
103 5-fold and 75% of genome were covered more than 10-fold  
104 (Supplementary Table S2). Those result indicated a reliable sequencing  
105 outcome.

106 The methylation level of each developmental stages was displayed  
107 in Fig 1a, revealing the layers and broilers have a similar global

108 methylation profile. The mCpGs in three different contexts showed  
109 similar proportion among 4 developmental stages (Fig 1b). Next, the  
110 methylation level distribution of mCpGs were analyzed at 4  
111 developmental stages. Generally, mCpGs showed a high methylation  
112 level in mCG context whereas showed a low methylation level in mCHG  
113 and mCHH contexts (Fig 1c and Supplementary Fig 1a). Then we  
114 measured the methylation level of different regions of gene and compared  
115 those in different stages and populations. Interestingly, we found that  
116 broilers showed statistically lower methylation level at all stages in mCG  
117 context than layers (Fig 1d). Besides, CpG islands (CGIs) were identified  
118 and the numbers of CGIs at different regions were counted  
119 (Supplementary Fig 1b). we observed more CGIs located in promoter  
120 regions of gene in broilers than layers, which indicates methylation in  
121 CGIs may involve in muscle development as CGIs located at promoters  
122 regions are important for controlling gene expression<sup>21</sup>.

123 Furthermore, the methylation level of lncRNAs assembled in  
124 RNA-seq of this experiment was also analyzed in similar way and  
125 compared with those of genes. Generally, broilers still showed lower  
126 methylation level in various types of lncRNA in mCG and mCHH  
127 contexts compared to laying hens whereas similar methylation level was  
128 observed among different types of lncRNA (Fig 2b and Supplementary  
129 Fig 2 c-d). Genes and lncRNAs had similar global methylation level and

130 both showed significant difference between two populations (Fig 2a and  
131 Supplementary Fig 2a-b). Those results suggest that faster muscle  
132 development of broilers may due to the lower methylation level in late  
133 embryonic stage compared with layer. Besides, the genomic distribution  
134 pattern of DNA methylation around genes and lncRNAs were analyzed.  
135 The upstream (2kb), first exon, first intron, internal exon, internal intron,  
136 last exon and downstream (2kb) of genes and lncRNAs across the  
137 genome were divided as different features and their methylation levels  
138 were measured through 20 bins, respectively. In general, the 5' upstream  
139 and 3'downstream regions were lower methylated than gene body regions.  
140 Besides, we also compared methylation level of features of gene with  
141 features of lncRNA (Fig 2c-d). It resulted that lncRNAs have relatively  
142 higher methylation level around TSS compared with genes ( $P<0.001$ ). In  
143 addition, methylation levels of different types of repeat region were also  
144 analyzed across the genome. Beside the significant differences between  
145 two populations, short interspersed nuclear elements (SINE) particularly  
146 showed lower methylation level across 4 stages in mCG context (Fig 3  
147 and Supplementary Fig 3).

148

#### 149 **Identification of differential methylation regions and genes.**

150 To explore the potential causes of divergences in muscle  
151 development between broilers and layers, the differential methylation loci

152 (DMLs) were identified in DSS package. Then DMRs were identified for  
153 E10, E13, E16 and E19 respectively based on DMLs. The DMRs were  
154 subsequently annotated to the genome and the distribution of the DMRs  
155 in whole genome were analyzed (Fig 4a and Supplementary Table S4-S7).  
156 Generally, the majority of DMRs located in intronic regions whereas a  
157 small part of DMRs distributed in promoters of gene (Fig 4a). The  
158 proportion analysis revealed that broilers had more hypomethylated  
159 regions across the genome in four developmental stages, indicating that  
160 low methylation in muscle development-related genes may account for  
161 broiler's fast muscle development (Fig 4b).

162 Subsequently, the differential methylation genes (DMGs) were  
163 defined as genes overlapped with at least one DMR in its body region.  
164 The Gene Ontology (GO) enrichment analyses were performed to  
165 investigate potential biological functions of the DMGs. Generally, DMGs  
166 in four developmental stages were most significantly enriched in terms  
167 related to nervous system. However, many muscle-related terms were  
168 also found in the lists especially at DMGs of E13 and E19 such as muscle  
169 organ development (47 genes; Q-value < 0.001), myotube cell  
170 development (12 genes; Q-value < 0.005), positive regulation of muscle  
171 organ development (17genes; Q-value < 0.001), and muscle cell  
172 differentiation (51 genes; Q-value < 0.003) etc. (Fig 4c, Supplementary  
173 Table S8-S11). Because DMRs were not unanimous among different



174 developmental stages, we merged the genomic position of DMRs of 24  
175 samples to form common DMRs and re-calculated the methylation level  
176 for each common DMR. The clustering analysis was performed using the  
177 common DMRs and displayed through heatmap. Different developmental  
178 stages were shown to cluster together which is indicative of the high  
179 quality of sampling and DMR calling in this experiment (Fig 5a).  
180 Moreover, the result of PCA was coincided with the clustering analysis  
181 (Fig 5b).

182

### 183 **Integrative analyses of DNA methylation and transcriptome**

184 To further explore whether methylation influences the gene and  
185 lncRNA expression in chicken, RNA-seq were used to measure the  
186 expression of genes and assembled novel lncRNAs. We identified 20656  
187 lncRNAs in total (Fig 6a). Most of them are lincRNAs (63.6%) (Fig 6b).  
188 Heatmap of 24 samples and PCA suggested developmental stages  
189 accounted for most variances (Fig 6c). We divided genes and lncRNAs  
190 into 5 groups respectively based on their expression level (highest,  
191 medium high, medium low and lowest) using a quantile way. Then we  
192 measured their methylation level in different groups of genes and  
193 lncRNAs, respectively. Generally, broilers and layers were shown to have  
194 similar methylation levels and negative correlation was observed in genes  
195 in both populations as the highest expression level group showed lowest

196 methylation level around TSS whereas the lowest expression level group  
197 showed the highest methylation level (Fig 6d, e). Interestingly, this  
198 negative correlation trend between expression and methylation was  
199 observed in downstream region of lncRNAs but not around TSS (Fig 6f,  
200 g). Moreover, the lncRNAs are usually higher methylated around TSS  
201 compared to genes (Fig 6d-g).

202 Next, the differential expression genes (DEGs) and lncRNA (DELs)  
203 calling were performed for subsequent analysis. Meanwhile, the cis-target  
204 and trans-target of lncRNAs were predicted, respectively. The DMRs  
205 were assigned to lncRNAs generated from RNA-seq in this study  
206 (Supplementary Table S12-S15) and the differential methylation lncRNA  
207 (DM lncRNA) were defined as DEL overlapped with DMR. The result  
208 showed that 55 DM lncRNAs were identified (13,16,11,15 in 4 stages,  
209 respectively) (Supplementary Table S16). Subsequently, we looked for  
210 DM lncRNA that was potential to regulate muscle development. In  
211 particular, the expression of a lncRNA (we named it MYH1-AS, Fig 7a)  
212 was highly correlated with methylation level of the DMR assigned to it  
213 (Spearman,  $Cor=-0.7513$ ,  $p<10^{-4}$ , Fig 7c). The expression of MYH1-AS  
214 was detected to dramatically increase in broilers compared to laying hens  
215 at E16 and E19 (Fig 7b). As the lncRNA was predicted by lncTar to  
216 target several genes in MYH1 chicken-specific isoforms like MYH1A,  
217 MYH1G, MYH1E etc., the expression correlations between the lncRNA

218 and its targets were calculated to search for its most likely target. Among  
219 its targets, MYH1E showed the highest correlation with MYH1-AS (Fig  
220 7d), indicative of potential target of MYH1-AS. To further explore the  
221 role of MYH1-AS in muscle development, the gene-lncRNA networks  
222 were constructed based on their mRNA expression connectivity using  
223 WGCNA and the subnetwork of MYH1-AS was extracted from the  
224 whole network. It revealed that MYH1-AS had a high correlation with  
225 some muscle-related genes in this subnetwork (Fig 7e). Moreover, the  
226 relationship between connectivity and correlation was visualized in Fig 7f.  
227 Interestingly, genes highly negatively correlated with MYH1-AS did not  
228 show high connectivity with it. All the gene showing the high  
229 connectivity with MYH1-AS were also highly positively correlated with  
230 the lncRNA (Fig 7f). Then a total of 168 genes with top 50% both high  
231 connectivity and correlation with MYH1-AS were selected to perform  
232 GO enrichment analysis in order to confirm the role of MYH1-AS in  
233 muscle (Fig 7g-j and Supplementary S17). The result showed that the  
234 majority of terms enriched by those genes were muscle related.

235

## 236 **Discussion**

237 The chicken provides a unique model to study embryology research  
238 of animal because of the accessibility of egg. As one of the most  
239 important energy sources for human diet, the muscle development of

240 chicken is a significant commercial feature worthy for studies. In this  
241 study, the broilers and laying hens were used to explore the muscle  
242 development of chicken in late embryonic period as they are artificially  
243 selected for different commercial use thereby are divergent in muscle  
244 development. Because of the crucial role of methylation in  
245 embryogenesis<sup>13</sup>, we performed whole genome bisulfite sequencing  
246 (WGBS) and RNA-seq for to systematically explore the prenatal  
247 landscapes of chicken muscle development. Previous methylome studies  
248 have been done using prenatal chicken or born chicken muscle<sup>12,22,23</sup>,  
249 however, those studies fails to display a comprehensive landscape of  
250 embryonic stages. We focused on more systematical study range from  
251 E10 to E19 between two chicken lines and aimed to elucidate the detail  
252 of embryonic muscle development.

253 The methylation level and proportion of different methylation  
254 contexts (mCG, mCHG, mCHH) of each developmental stage (Fig 1 a-d)  
255 indicated the layers and broilers have a similar global methylation profile.  
256 Additionally, the methylation level of different types of mCgG were  
257 measured (Fig 1 e-g). Those results are coincided with previous studies in  
258 chicken muscle<sup>18</sup>. The distribution proportion of mCpG in genome was  
259 different from the study of Zhang at e1<sup>23</sup> as the mCpG in repeat region  
260 accounts for less genomic proportion in our study, probably because they  
261 used born chicken whereas the we performed the experiment on prenatal

262 chicken. However, more studies were required to explore the detail.

263 We next comprehensively compared the methylation level of genes  
264 and lncRNAs among different developmental stages and chicken lines  
265 (Fig 2a). Generally, laying hens showed a significantly higher  
266 methylation level than broilers in mCG context in both genes and  
267 lncRNAs, which may be responsible for their divergences in muscle  
268 development. Furthermore, different types of lncRNA (sense, intronic,  
269 antisense and lincRNA) were globally compared at methylation level and  
270 there were no significant differences among different types of lncRNAs,  
271 although layers and broilers still revealed significant variances (Fig 2b).  
272 Then genomic methylation around genes and lncRNAs were measured  
273 across the genome and the transcription start sites (TSS) were detected to  
274 be low methylated in genes (Fig 2c). The broilers and layers showed the  
275 similar trends around the transcription start site (TSS) which is coincident  
276 with the patterns of previous studies in chicken<sup>12,18</sup>, as well as in bovine  
277 muscle tissue<sup>11</sup> and pig<sup>24</sup>. However, TSS of lncRNAs were usually higher  
278 methylated compare to genes (Fig 2c-d), which is able to explain why  
279 mRNA expression of lncRNAs are usually lower than genes ( $P < 10^{-8}$ )  
280 because methylation in promoter region usually affects gene expression<sup>25</sup>.  
281 In addition, the methylation level of different types of TEs (SINE, LINE,  
282 LTR, DNA and Satellite) were also measured in genome (Fig 3) and  
283 layers were found higher methylated than broilers in TEs regions.

284 Transposable elements are usually inactivated in animals but TEs were  
285 reported to have a present-day function in early development of human  
286 and other mammals to provide cis-regulatory elements that co-ordinate  
287 the expression of groups of genes<sup>26</sup>. As epigenetic regulation is important  
288 for activity of TEs<sup>27</sup>, the difference showed in the two chicken lines may  
289 also account for the divergence in development.

290 The clustering heatmap and principle component analysis (PCA)  
291 were performed using common DMRs among 4 developmental stages.  
292 The expected classifications were observed in both analyses and indicated  
293 the reliable outcomes of sequencing and DMR calling (Fig 5a-b).  
294 Moreover, we found that DMRs between two chicken lines mainly  
295 distributed in intron regions and intergenic regions (Fig 4a), whose result  
296 is coincide with previous study in chicken<sup>12</sup>, indicative of its important  
297 role in development regulation. However, as methylation in gene body  
298 region affects gene expression in several sophisticated ways<sup>21</sup>, further  
299 studies on how methylation of the intron regions influences gene  
300 expression are required to elucidate the complicated epigenetic  
301 mechanism underlying development in chickens. Furthermore, the  
302 proportion of hyper and hypo methylated regions were analyzed and the  
303 majority of DMRs were detected to be hypomethylated regions in broilers,  
304 indicating that low methylation may be responsible for fast muscle  
305 development. This result was coincided with former result in this study

306 (Fig 4b, Fig 2a-b). Subsequently, genes with overlapped with DMR at  
307 different times were regarded as DMGs and used for GO enrichment  
308 analysis, respectively. We found that DMGs at E13 and E19 were  
309 significantly enriched in muscle related terms, suggesting that  
310 methylation play an important role in embryonic stage muscle  
311 development. Additionally, DMGs among 4 stages were both  
312 significantly enriched in nerve development related terms, which may  
313 relate to the impact of domestication and artificial breeding. Integrative  
314 analysis was conducted to study the association between methylation  
315 level and mRNA expression. We noticed that mRNA and methylation  
316 level around TSS were negative correlated in genes which was widely  
317 proved but not lncRNAs, indicating that DNA methylation regulates  
318 lncRNA expression in a more complex way.

319 To explore which lncRNA may potentially influence muscle  
320 development, the DM lncRNAs were identified and the correlation  
321 between DM lncRNA and DMR assigned to it were measured. In  
322 particular, we noticed that MYH1-AS showed high correlation with its  
323 target MYH1E and the DMR located in its intron region. Further  
324 WGCNA analysis revealed that some muscle related genes were highly  
325 correlated with MYH1-AS in its subnetwork (Fig 7e). For example,  
326 MYLK2, a muscle-specific gene, expresses skMLCK specifically  
327 in skeletal muscles<sup>28,29</sup>. ABLIM1 was reported to be related to muscle

328 weakness and atrophy<sup>30</sup>. Increased PDK4 expression may be required for  
329 the stable modification of the regulatory characteristics of PDK observed  
330 in slow-twitch muscle in response to high-fat feeding<sup>31</sup> and some other  
331 genes in the network such as MyoZ1, MYPN, ZBTB16 etc. were also  
332 revealed to be muscle or meat quality related genes<sup>32-35</sup>. Therefore, it is  
333 reasonable that MYH1-AS functions in muscle development. Notably, as  
334 we noticed that high correlation did not exactly mean high connectivity  
335 either (Fig 7f), we also performed GO enrichment analysis using 168  
336 genes which had top 50% both high connectivity<sup>36</sup> and correlation values  
337 with MYH1-AS in its network as input. It resulted in GO terms of which  
338 the majority were muscle related terms (Fig 7f-g), strongly indicative of  
339 the MYH1-AS functioning in muscle development. Therefore, it is  
340 reasonable to assume that MYH1-AS was regulated by DNA methylation  
341 and participated muscle development during embryonic stage.

342 Our experiment revealed a comprehensive landscape of DNA  
343 methylome and transcriptome during embryonic developmental stage.  
344 Besides, we also found one lncRNA named MYH1-AS may potentially  
345 play a part in muscle development in chicken and provided evidence for  
346 this conclusion. Moreover, we provided a resource for further  
347 investigating the genetic regulation of methylation and gene expression in  
348 embryonic chicken. However, more studies are needed to elucidate the  
349 detailed mechanism how DNA methylation impacts lncRNA expression



350 and how the lncRNA regulates myogenesis.

351

## 352 **Materials and Methods**

### 353 **Sample collection**

354 The fertilized eggs of Rose and WhiteLoghorn were incubated in the  
355 same condition. The breast muscle and blood were collected at E10, E13,  
356 E16, E19. After sex determination, only samples identified as male were  
357 kept for next experiment. A total of 24 embryonic chicken were used in  
358 the study to form eight groups: E10, E13, E16, E19 for Rose and  
359 WhiteLoghorn, respectively. Each group included 3 individuals as  
360 biological replicates.

361

### 362 **DNA and RNA extraction**

363 Genomic DNA was extracted using an animal genomic DNA kit  
364 (Tiangen, China) following the manufacturer's instructions. The DNA  
365 integrity and concentration were measured by agarose gel electrophoresis  
366 and NanoDrop spectrophotometer, respectively. Total RNA was isolated  
367 using TRIzol (TAKARA, Dalian, China) 110 reagent according to the  
368 manufacturers' instruction. RNA was reverse 111 transcribed by  
369 TAKARA PrimeScript™ RT reagent kit (TAKARA) 112 according to  
370 the manufacturers' instruction.

371

## 372 **Library construction and sequencing**

373 Bisulfite sequencing libraries were prepared using the TruSeq Nano  
374 DNA LT kit (Illumina, San Diego, CA, USA). The genomic DNAs were  
375 then fragmented into 100–300 bp by sonication (Covaris, USA) and  
376 purified using a MiniElute PCR Purification Kit (QIAGEN, Silicon  
377 Valley Redwood City, CA, USA). The fragmented DNAs were end  
378 repaired and a single ‘A’ nucleotide was appended to the 3’ end of each  
379 fragment. After ligating the DNAs to the sequencing adapters, the  
380 genomic fragments were bisulfite converted via a Methylation-Gold kit  
381 (ZYMO, Murphy Ave. Irvine, CA, USA). The converted DNA fragments  
382 were PCR amplified and sequenced as paired-end reads using the  
383 Illumina HiSeq xten platform by the Biomarker Technologies company  
384 (Beijing, China).

385

## 386 **Data alignment and process**

387 The raw data in the FastQ format generated by the Illumina HiSeq  
388 were pre-processed by removing reads containing adapters, N (unknown  
389 bases) > 10%, and those which over 50% of the sequence exhibited low  
390 quality value (Qphred score  $\leq 10$ ). During the process, we also calculated  
391 the Q20, Q30, CG content for each sample data. The reads remained after  
392 this procedure were clean reads and used for subsequent analysis. The  
393 methylation data were aligned to reference genome Gallus gallus 5.0 by

394 Bismark software<sup>37</sup>. Meanwhile, the number of aligned clean reads in  
395 unique position of reference genome were calculated as unique mapped  
396 reads number. The proportion of the number of aligned reads in the total  
397 number of reads was calculated as the mapping rate. Subsequently, the  
398 methylation level of single base was then calculated by the ratio of the  
399 number of methylated reads to the sum of total reads covered the locus.  
400 Finally, we used a binominal distribution test approach to determine  
401 whether a locus was regarded as methylated locus with the criteria:  
402 coverage depth > 4 and FDR<0.05<sup>37</sup>.

403 The transcriptional libraries were sequenced on an Illumina HiSeq  
404 xten platform at the Biomarker Technologies Company (Beijing, China).  
405 The obtained transcriptome data were filtered by removing sequences  
406 containing adaptors, low-quality reads (Q-value < 20), and reads  
407 containing more than 10% of unknown nucleotides (N) and were aligned  
408 to reference genome Gallus gallus 5.0 by HISAT2<sup>38</sup> then the transcript  
409 assembly and FPKM calculation were performed using the StringTie<sup>39</sup>.  
410 Transcripts mapped to the coding genes of reference were used to  
411 subsequent differential expression gene calling.

412

### 413 **lncRNA identification**

414 In order to identify the potential lncRNA, the assembled transcripts  
415 generated from the StringTie were submitted to CPC<sup>40</sup>, CNCI<sup>41</sup>, CPAT<sup>42</sup>

416 and pfam<sup>43</sup> software with default parameters to predict the potential  
417 lncRNAs. Only transcripts predicted as lncRNA shared among four tools  
418 were regarded as candidate lncRNA. Then the cis-target gene of lncRNA  
419 were defined as neighbor gene in 100 kb genomic distance from the  
420 lncRNA and were identified using in-house script. The trans-target  
421 prediction of lncRNAs was performed by LncTar software<sup>44</sup>.

422

### 423 **DMLs and DMRs calling**

424 The differential methylation locus (DMLs) and differential  
425 methylation regions (DMRs) between broilers and layers at each  
426 comparison were detected separately using Dispersion Shrinkage for  
427 Sequencing Data (DSS) package in R<sup>45-48</sup>. The differential methylation  
428 regions (DMRs) were then calculated in with default parameters.  
429 Subsequently, DMRs were annotated using CHIPseeker package in R<sup>49</sup>.

430 Gene overlapped with at least one DMR is defined as differential  
431 methylation gene (DMG). Common DMRs among 4 developmental  
432 stages were identified by merging all positions of DMRs in 24 samples  
433 and re-calculating the methylation level for each merged DMR position  
434 with an average approach using mCpG data.

435

### 436 **DEGs and DELs calling**

437 The differential expression genes (DEGs) calling and the differential

438 expression lncRNA (DEL) calling between two populations at each time  
439 point were performed separately using the DEseq<sup>50</sup>. The results were  
440 filtering with the criteria: (1) fold change >2 (2) FDR<0.5. The transcripts  
441 satisfied both standards were regarded as DEGs or DELs.

442

### 443 **Validation for RNA-seq by quantitative Real-time RCP(Q-PCR)**

444 Total RNA was purified and reversely transcribed into cDNA using  
445 PrimerScriptR RT reagent Kit with gDNA Eraser (Takara Biotechnology  
446 (Dalian) Co., Ltd) following the specification. Quantities of mRNA were  
447 then measured with qRT-PCR using a CFX96TM real-time PCR  
448 detection system (Bio-Rad, USA). The qRT-PCR assays were then  
449 performed with a volume of 20  $\mu$ L containing 10  $\mu$ L SYBR Green  
450 Mixture, 7  $\mu$ L deionized water, 1  $\mu$ L template of cDNA, 1  $\mu$ L of each  
451 primer and with following thermal conditions: 95 °C for 5 min, 45 cycles  
452 of 95 °C for 10 sec, 60 °C for 10 sec, 72 °C for 10 sec. Primer sequences  
453 used for qRT-PCR assays are displayed in Supplementary Table Last.  
454  $\beta$ -catin gene was used as internal control. Each qPCR assay was carried  
455 out in triplicate. The relative gene expression was calculated by using the  
456  $2^{-\Delta\Delta Ct}$  method<sup>51</sup>.

457

### 458 **Functional enrichment analysis and WGCNA analysis**

459 Gene ontology enrichment analyses were conducted for DMGs at

460 E10, E13, E16, E19 comparisons respectively to explore their potential  
461 roles in muscle development. These analyses were performed by  
462 clusterProfiler package implemented in R<sup>52</sup>. A hypergeometric test was  
463 applied to map DMGs to terms in the GO database to search for  
464 significantly enriched terms in DMGs compared to the genome  
465 background.

466 The WGCNA analysis was performed using WGCNA package  
467 implemented in R<sup>36</sup>. We used all the differential expression lncRNAs and  
468 all the genes as input. Then, variable coefficient was used to filter  
469 transcripts with low expression change. The variable coefficient was  
470 calculated as follow:  $C_v = \sigma/\mu$ . The  $\sigma$  is the standard deviation and  $\mu$   
471 represents the mean value of expression of input transcripts. Only  
472 transcripts with ranked top 30% high  $C_v$  value were used for WGCNA  
473 analysis. After the entire network was constructed, only genes with  
474 connectivity more than 0.15 were selected for subsequent subnetwork  
475 analysis.

476

477

478

479

480

481

482 **Fig 1.** Genome-wide profiles of DNA methylation among different  
483 sample groups. **(a)** Genomic methylation level in either layers or broilers  
484 at E10, E13, E16, E19, respectively. Methylation level were range from 0  
485 to 1. **(b-d)** Proportion of mCpG in different genomic features at different  
486 developmental stages in mCG, mCHG and mCHH contexts, respectively.  
487 **(e-g)** Methylation level of CpGs was equally divided into 10 intervals and  
488 the percentage of each interval were measured using E10 as example.

489

490 **Fig 2.** Comparatively measurement of methylation level of genes  
491 and lncRNA. **(a)** Comparison of methylation level of genes or lncRNAs  
492 between layers and broilers in three different contexts. **(b)** Measurement  
493 of methylation level of different types of lncRNAs. \*  $P < 0.05$ , \*\*  $P < 0.01$   
494 for comparison between two chicken lines. The red star means the  
495 methylation level of layers is significantly higher than broilers whereas  
496 the green star represents an opposite result. **(c-d)** Genomic methylation  
497 around genes and lncRNAs were measured across the genome,  
498 respectively. Transcripts were separated into seven regions (upstream,  
499 first exon, first intron, inner exon, inner intron, last exon and downstream)  
500 and each region was equally divided into 20 bins for visualization.

501

502 **Fig 3.** Methylation level of different types of TEs using E19 as an  
503 example. **(a)** Comparatively measurement of methylation of SINE, LINE,

504 LTR, DNA, Satellite regions between two chicken lines in mCG context.

505 **(b)** Methylation of different types of TEs for upstream, body and  
506 downstream regions in three different contexts using 20 bins across the  
507 whole genome.

508

509 **Fig 4.** Analyses of DMRs at 4 developmental stages. DMR calling  
510 were performed in mCG, mCHG and mCHH, respectively. **(a)** Numbers  
511 of DMRs in different genomic features (promoter, exon, intron, intergenic,  
512 and UTR regions). **(b)** Relative proportion of hyper DMRs to hypo  
513 DMRs in different CpG contexts. **(c)** The results of Gene Ontology (GO)  
514 analysis for genes with overlapped with DMR. Only part of the terms was  
515 selected for display. The red color means GO-BP terms, the blue color  
516 means GO-CC terms whereas green color represents GO-MF terms. The  
517 number in bracket means number of genes enriched in a specific term.

518

519 **Fig 5.** Heatmap clustering analysis and PCA analysis. **(a)** Heatmap  
520 clustering using merged common DMRs among 24 samples (see  
521 Materials and Methods). **(b)** The result of PCA analysis using common  
522 DMRs among 24 samples. Only the first component and the second  
523 component were visualized.

524

525 **Fig 6.** LncRNAs identification and correlation analysis between



526 methylome and transcriptome. **(a)** Number of different types of lncRNAs  
527 in all developmental stages. **(b)** Venn diagram of lncRNAs identified  
528 through different software. **(c)** Hierarchical cluster analysis of lncRNAs  
529 using their expression level. Replicates were merged together in the  
530 analysis. **(d-g)** The genes and lncRNAs were divided into five groups  
531 based on their expression levels, respectively. Then the methylation level  
532 around TSS and TES of each group were measured using 20 bins across  
533 the whole genome for layers and broilers.

534

535 **Fig 7.** Comprehensive analysis of lncRNA MYH1-AS. **(a)**  
536 visualization of the transcript of MYH1-AS and DMR overlapped it. **(b)**  
537 Expression level of MYH1-AS in layers and broilers at different  
538 developmental stages. **(c)** Correlation between methylation of DMR and  
539 expression of MYHA-AS using Spearman method. **(d)** Correlation  
540 between expression of MYH1-AS and expression of its potential target  
541 MYH1E. **(e)** The whole gene-lncRNA network and subnetwork including  
542 MYH1-AS extracted from the entire network. **(f)** Relationship between  
543 correlation and connectivity of gene and MYH1-AS. The red points  
544 represent genes with both high connectivity and correlation with  
545 MYH1-A and were selected for subsequent GO analysis. **(g)** Comparison  
546 of connectivity value between genes selected (red points) and all genes  
547 with in the subnetwork (background). \*  $P < 0.05$ , \*\*  $P < 0.01$  for

548 comparison between selected genes and background. **(h-j)** Results of GO

549 analysis for genes selected.

550

551

552

553

554

555

556

557

558

559

560

561

562

563

564

565

566

567

568

569

## 570 **References**

- 571 1. Goldberg, A. D., Allis, C. D. and Bernstein, E. 2007, Epigenetics: a landscape takes shape. *Cell*,  
572 **128**, 635-638.
- 573 2. Guttman, M., Amit, I., Garber, M., et al. 2009, Chromatin signature reveals over a thousand  
574 highly conserved large non-coding RNAs in mammals. *Nature*, **458**, 223.
- 575 3. Feinberg, A. P. 2007, Phenotypic plasticity and the epigenetics of human disease. *Nature*,  
576 **447**, 433-440.
- 577 4. Sanford, J. P., Clark, H. J., Chapman, V. M. and Rossant, J. 1987, Differences in DNA  
578 methylation during oogenesis and spermatogenesis and their persistence during early  
579 embryogenesis in the mouse. *Genes & Development*, **1**, 1039-1046.
- 580 5. Zhou, Z. Y., Li, A., Wang, L. G., et al. 2015, DNA methylation signatures of long intergenic  
581 noncoding RNAs in porcine adipose and muscle tissues. *Scientific Reports*, **5**, 15435.
- 582 6. Yang, Y., Liang, G., Niu, G., et al. 2017, Comparative analysis of DNA methylome and  
583 transcriptome of skeletal muscle in lean-, obese-, and mini-type pigs. *Scientific Reports*, **7**.
- 584 7. Cesana, M., Cacchiarelli, D., Legnini, I., et al. 2011, A long noncoding RNA controls muscle  
585 differentiation by functioning as a competing endogenous RNA. *Cell*, **147**, 358-369.
- 586 8. Jaenisch, R. and Bird, A. 2003, Epigenetic regulation of gene expression: how the genome  
587 integrates intrinsic and environmental signals.
- 588 9. Miyata, K., Miyata, T., Nakabayashi, K., et al. 2015, DNA methylation analysis of human  
589 myoblasts during in vitro myogenic differentiation: de novo methylation of promoters of  
590 muscle-related genes and its involvement in transcriptional down-regulation. *Human Molecular  
591 Genetics*, **24**, 410-423.
- 592 10. Huszar, G. 1972, Developmental Changes of the Primary Structure and Histidine Methylation  
593 in Rabbit Skeletal Muscle Myosin. *Nature New Biology*, **240**, 260-264.
- 594 11. Huang, Y. Z., Sun, J. J., Zhang, L. Z., et al. 2014, Genome-wide DNA methylation profiles and  
595 their relationships with mRNA and the microRNA transcriptome in bovine muscle tissue (*Bos  
596 taurine*). *Scientific Reports*, **4**, 6546.
- 597 12. Zhang, M., Yan, F. B., Li, F., et al. 2017, Genome-wide DNA methylation profiles reveal novel  
598 candidate genes associated with meat quality at different age stages in hens. *Scientific Reports*, **7**,  
599 45564.
- 600 13. Carriè, E., Dé†Ezvilanueva, A., Lois, S., et al. 2015, Deconstruction of DNA methylation  
601 patterns during myogenesis reveals specific epigenetic events in the establishment of the skeletal  
602 muscle lineage. *Stem Cells*, **33**, 2025-2036.
- 603 14. Zhi, H., Li, X., Wang, P., et al. 2017, Lnc2Meth: a manually curated database of regulatory  
604 relationships between long non-coding RNAs and DNA methylation associated with human  
605 disease. *Nucleic Acids Research*.
- 606 15. Zhang, C., Wang, X., Li, X., et al. 2017, The landscape of DNA methylation-mediated  
607 regulation of long non-coding RNAs in breast cancer. *Oncotarget*, **8**, 51134-51150.
- 608 16. Heilmann, K., Toth, R., Bossmann, C., Klimo, K., Plass, C. and Gerhauser, C. 2017,  
609 Genome-wide screen for differentially methylated long noncoding RNAs identifies *Esrp2* and  
610 lncRNA *Esrp2-as* regulated by enhancer DNA methylation with prognostic relevance for human  
611 breast cancer. *Oncogene*.
- 612 17. Wu, W., Bhagat, T. D., Yang, X., et al. 2013, Hypomethylation of noncoding DNA regions and

- 613 overexpression of the long noncoding RNA, AFAP1-AS1, in Barrett's esophagus and esophageal  
614 adenocarcinoma. *Gastroenterology*, **144**, 956.
- 615 18. Li, J., Li, R., Wang, Y., et al. 2015, Genome-wide DNA methylome variation in two genetically  
616 distinct chicken lines using MethylC-seq. *Bmc Genomics*, **16**, 1-13.
- 617 19. Li, Q., Wang, Y., Hu, X., Zhao, Y. and Li, N. 2015, Genome-wide Mapping Reveals  
618 Conservation of Promoter DNA Methylation Following Chicken Domestication. *Sci Rep*, **5**, 8748.
- 619 20. Li, Q., Li, N., Hu, X., et al. 2011, Genome-wide mapping of DNA methylation in chicken. *Plos*  
620 *One*, **6**, e19428.
- 621 21. Jones, P. A. 2012, Functions of DNA methylation: islands, start sites, gene bodies and beyond.  
622 *Nature Reviews Genetics*, **13**, 484-492.
- 623 22. Li, S., Zhu, Y., Zhi, L., et al. 2016, DNA Methylation Variation Trends during the Embryonic  
624 Development of Chicken. *Plos One*, **11**, e0159230.
- 625 23. Hu, Y., Xu, H., Li, Z., et al. 2013, Comparison of the genome-wide DNA methylation profiles  
626 between fast-growing and slow-growing broilers. *Plos One*, **8**, e56411.
- 627 24. Wang, H., Wang, J., Ning, C., et al. 2017, Genome-wide DNA methylation and transcriptome  
628 analyses reveal genes involved in immune responses of pig peripheral blood mononuclear cells  
629 to poly I:C. *Scientific Reports*, **7**, 9709.
- 630 25. Lorincz, M. C., Dickerson, D. R., Schmitt, M. and Groudine, M. 2004, Intragenic DNA  
631 methylation alters chromatin structure and elongation efficiency in mammalian cells. *Nature*  
632 *Structural & Molecular Biology*, **11**, 1068-1075.
- 633 26. Garcia-Perez, J. L., Widmann, T. J. and Adams, I. R. 2016, The impact of transposable  
634 elements on mammalian development. *Development*, **143**, 4101-4114.
- 635 27. Waterland, R. A. and Jirtle, R. L. 2003, Transposable elements: targets for early nutritional  
636 effects on epigenetic gene regulation. *Molecular and cellular biology*, **23**, 5293-5300.
- 637 28. Kamm, K. E. and Stull, J. T. 2001, Dedicated myosin light chain kinases with diverse cellular  
638 functions. *Journal of Biological Chemistry*, **276**, 4527-4530.
- 639 29. Zhi, G., Ryder, J. W., Huang, J., et al. 2005, Myosin light chain kinase and myosin  
640 phosphorylation effect frequency-dependent potentiation of skeletal muscle contraction. *Proc*  
641 *Natl Acad Sci U S A*, **102**, 17519-17524.
- 642 30. Ohsawa, N., Koebis, M., Mitsuhashi, H., Nishino, I. and Ishiura, S. 2015, ABLIM1 splicing is  
643 abnormal in skeletal muscle of patients with DM 1 and regulated by MBNL, CELF and PTBP 1.  
644 *Genes to Cells*, **20**, 121-134.
- 645 31. Holness, M. J., Kraus, A., Harris, R. A. and Sugden, M. C. 2000, Targeted upregulation of  
646 pyruvate dehydrogenase kinase (PDK)-4 in slow-twitch skeletal muscle underlies the stable  
647 modification of the regulatory characteristics of PDK induced by high-fat feeding. *Diabetes*, **49**,  
648 775-781.
- 649 32. Ying, F., Gu, H., Xiong, Y. and Zuo, B. 2017, Analysis of differentially expressed genes in  
650 gastrocnemius muscle between DGAT1 transgenic mice and wild-type mice. *BioMed research*  
651 *international*, **2017**.
- 652 33. Caremani, M., Yamamoto, D. L., Nigro, V., Lombardi, V., Bang, M. L. and Linari, M. 2014, The  
653 Role of Myopalladin in Skeletal Muscle. *Biophysical Journal*, **106**, 767a.
- 654 34. Shum, A. M., Mahendradatta, T., Taylor, R. J., et al. 2012, Disruption of MEF2C signaling and  
655 loss of sarcomeric and mitochondrial integrity in cancer-induced skeletal muscle wasting. *Aging*  
656 (*Albany NY*), **4**, 133.

- 657 35. Luo, B., Ye, M., Xu, H., et al. 2018, Expression analysis, single-nucleotide polymorphisms of  
658 the Myoz1 gene and their association with carcass and meat quality traits in chickens. *Italian*  
659 *Journal of Animal Science*, 1-9.
- 660 36. Langfelder, P. and Horvath, S. 2008, WGCNA: an R package for weighted correlation network  
661 analysis. *BMC bioinformatics*, **9**, 559.
- 662 37. Krueger, F. and Andrews, S. R. 2011, Bismark: a flexible aligner and methylation caller for  
663 Bisulfite-Seq applications. *Bioinformatics*, **27**, 1571-1572.
- 664 38. Kim, D., Langmead, B. and Salzberg, S. L. 2015, HISAT: a fast spliced aligner with low memory  
665 requirements. *Nature Methods*, **12**, 357.
- 666 39. Pertea, M., Pertea, G. M., Antonescu, C. M., Chang, T. C., Mendell, J. T. and Salzberg, S. L.  
667 2015, StringTie enables improved reconstruction of a transcriptome from RNA-seq reads. *Nature*  
668 *Biotechnology*, **33**, 290-295.
- 669 40. Kong, L., Zhang, Y., Ye, Z. Q., et al. 2007, CPC: assess the protein-coding potential of  
670 transcripts using sequence features and support vector machine. *Nucleic Acids Research*, **35**,  
671 W345.
- 672 41. Sun, L., Luo, H., Bu, D., et al. 2013, Utilizing sequence intrinsic composition to classify  
673 protein-coding and long non-coding transcripts. *Nucleic Acids Research*, **41**, e166.
- 674 42. Wang, L., Park, H. J., Dasari, S., Wang, S., Kocher, J. P. and Wei, L. 2013, CPAT:  
675 Coding-Potential Assessment Tool using an alignment-free logistic regression model. *Nucleic*  
676 *Acids Research*, **41**, e74-e74.
- 677 43. Finn, R. D., Tate, J., Mistry, J., et al. 2011, A: The Pfam protein families database. *Nucleic Acids*  
678 *Research*, **32**, D138.
- 679 44. Li, J., Ma, W., Zeng, P., et al. 2015, LncTar: a tool for predicting the RNA targets of long  
680 noncoding RNAs. *Briefings in Bioinformatics*, **16**, 806.
- 681 45. Wu, H., Wang, C. and Wu, Z. 2012, A new shrinkage estimator for dispersion improves  
682 differential expression detection in RNA-seq data. *Biostatistics*, **14**, 232-243.
- 683 46. Feng, H., Conneely, K. N. and Wu, H. 2014, A Bayesian hierarchical model to detect  
684 differentially methylated loci from single nucleotide resolution sequencing data. *Nucleic acids*  
685 *research*, **42**, e69-e69.
- 686 47. Wu, H., Xu, T., Feng, H., et al. 2015, Detection of differentially methylated regions from  
687 whole-genome bisulfite sequencing data without replicates. *Nucleic acids research*, **43**,  
688 e141-e141.
- 689 48. Park, Y. and Wu, H. 2016, Differential methylation analysis for BS-seq data under general  
690 experimental design. *Bioinformatics*, **32**, 1446-1453.
- 691 49. Yu, G., Wang, L. G. and He, Q. Y. 2015, ChIPseeker: an R/Bioconductor package for ChIP peak  
692 annotation, comparison and visualization. *Bioinformatics*, **31**, 2382-2383.
- 693 50. Anders, S., McCarthy, D. J., Chen, Y., et al. 2013, Count-based differential expression analysis  
694 of RNA sequencing data using R and Bioconductor. *Nature Protocols*, **8**, 1765.
- 695 51. Livak, K. J. and Schmittgen, T. D. 2001, Analysis of relative gene expression data using  
696 real-time quantitative PCR and the 2<sup>(-Delta Delta C(T))</sup> Method. *Methods*, **25**, 402-408.
- 697 52. Yu, G., Wang, L.-G., Han, Y. and He, Q.-Y. 2012, clusterProfiler: an R package for comparing  
698 biological themes among gene clusters. *Omics: a journal of integrative biology*, **16**, 284-287.

699

**Fig 1a****Methylation Level of Different Developmental Stages**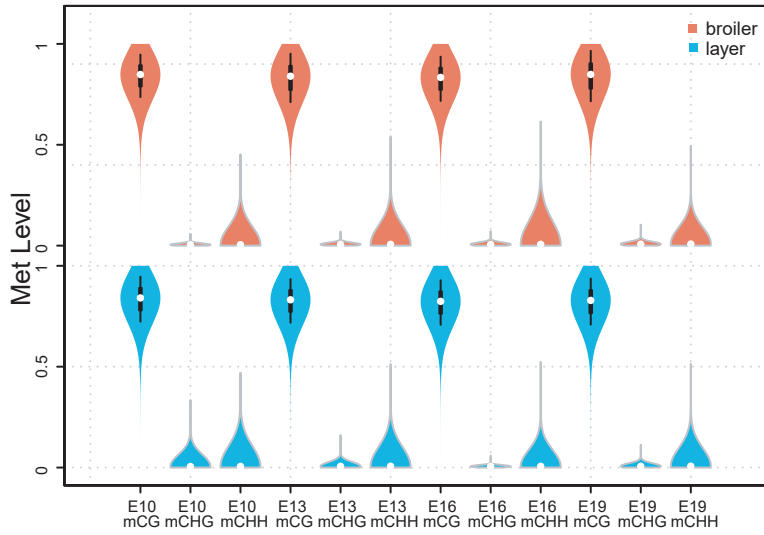**Fig 1b**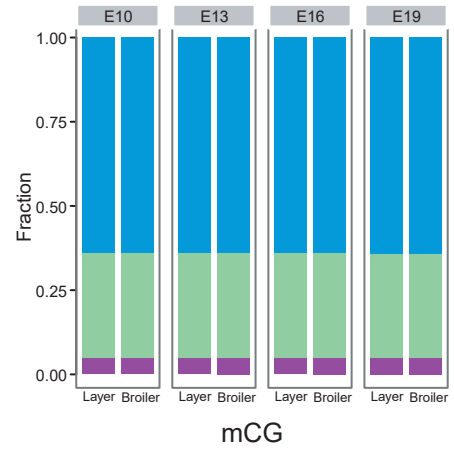**Fig 1c**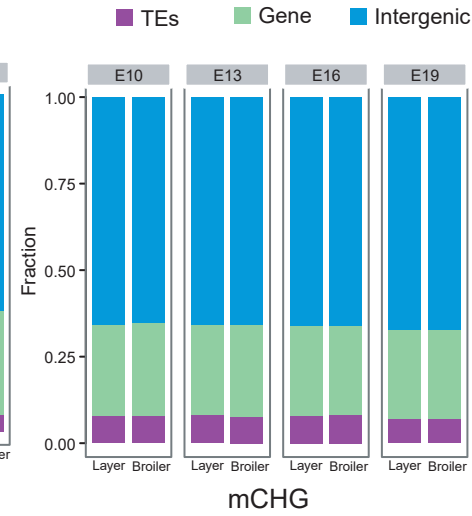**Fig 1d**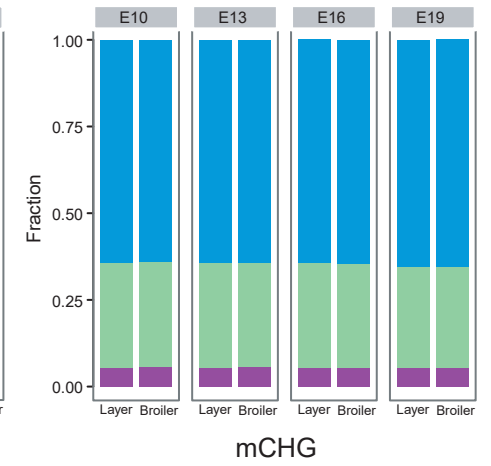**Fig 1e**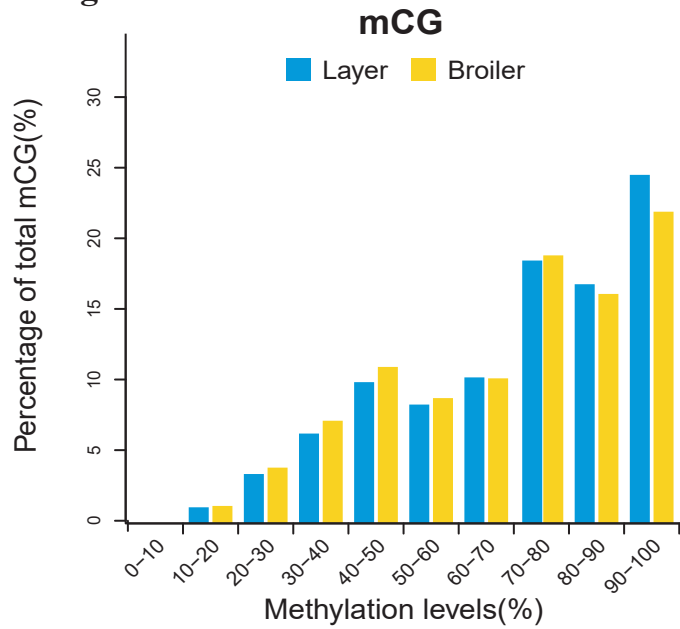**Fig 1f**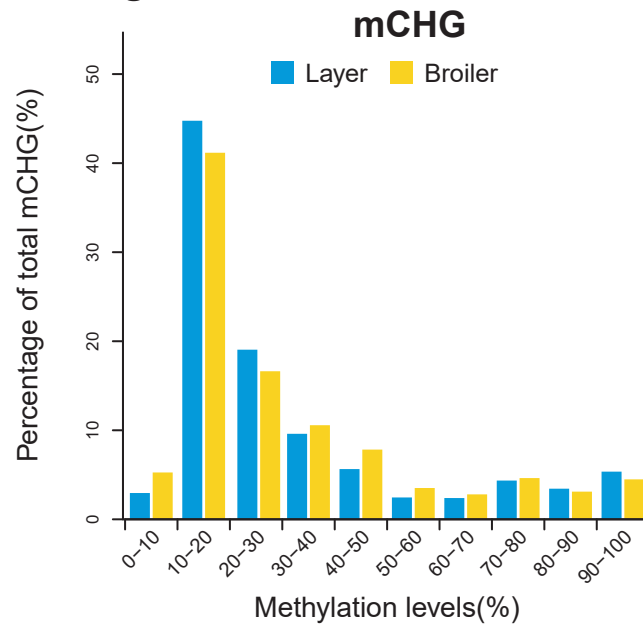**Fig 1g**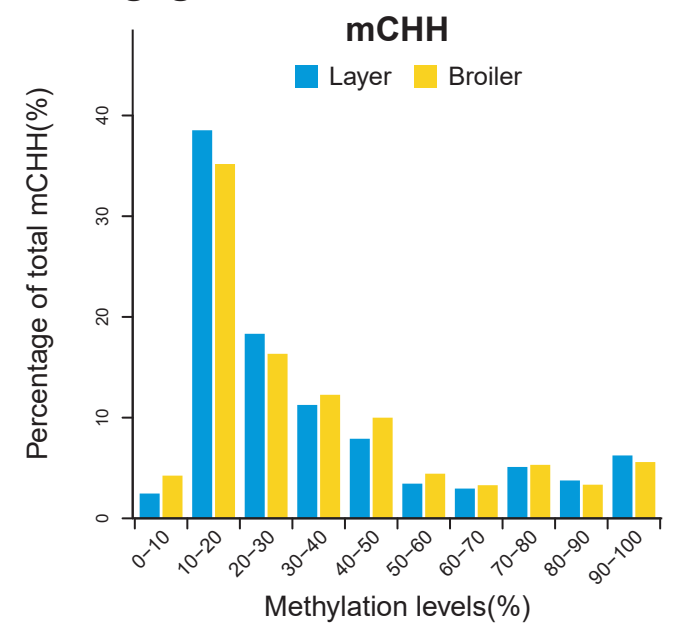

**Fig 2a**

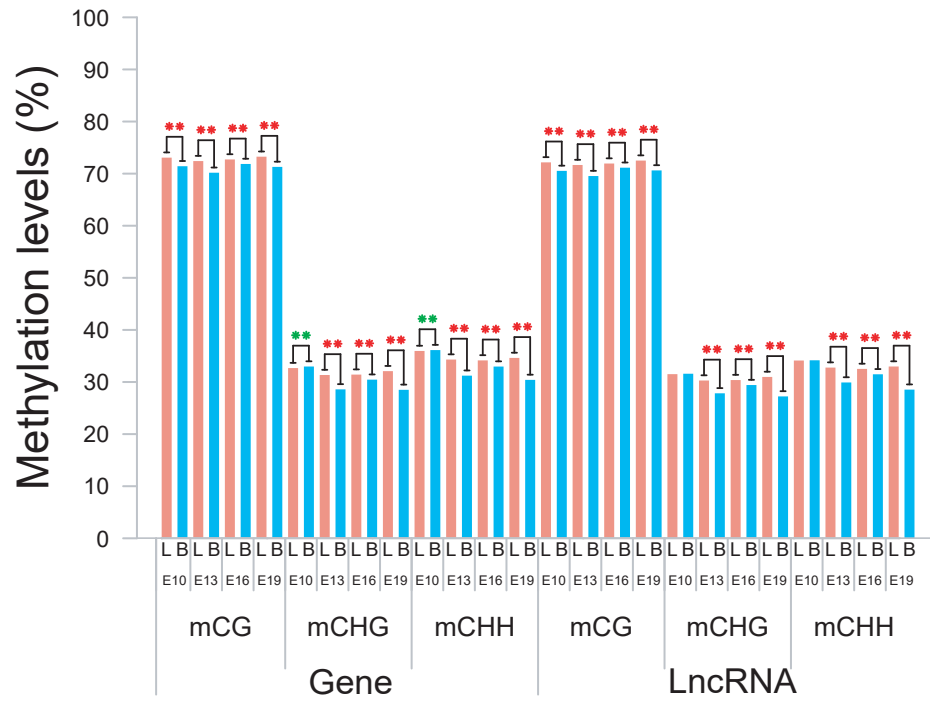

**Fig 2b**

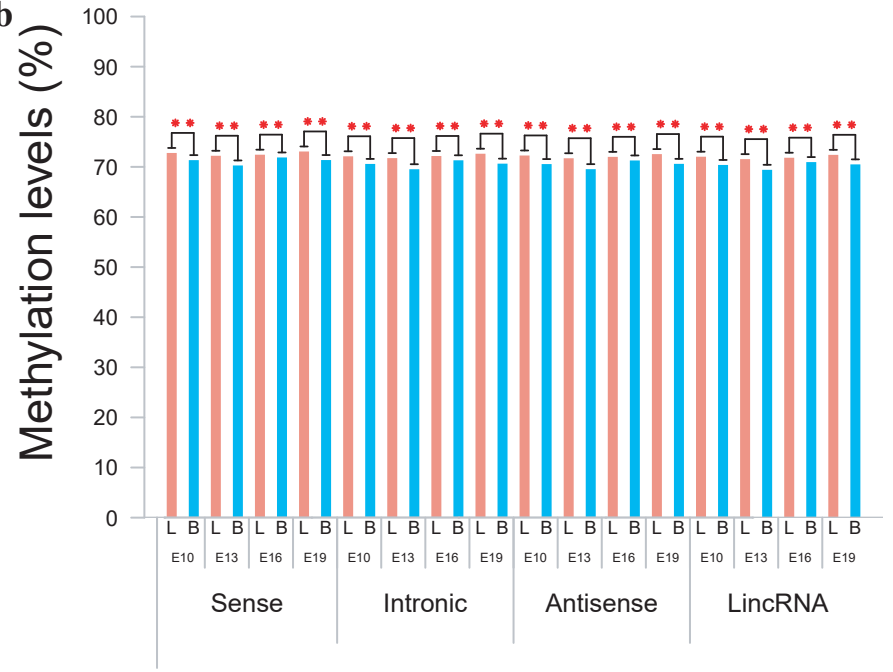

**Fig 2c**

**Methylation Level of of CG/CHG/CHH of Different Gene Elements**

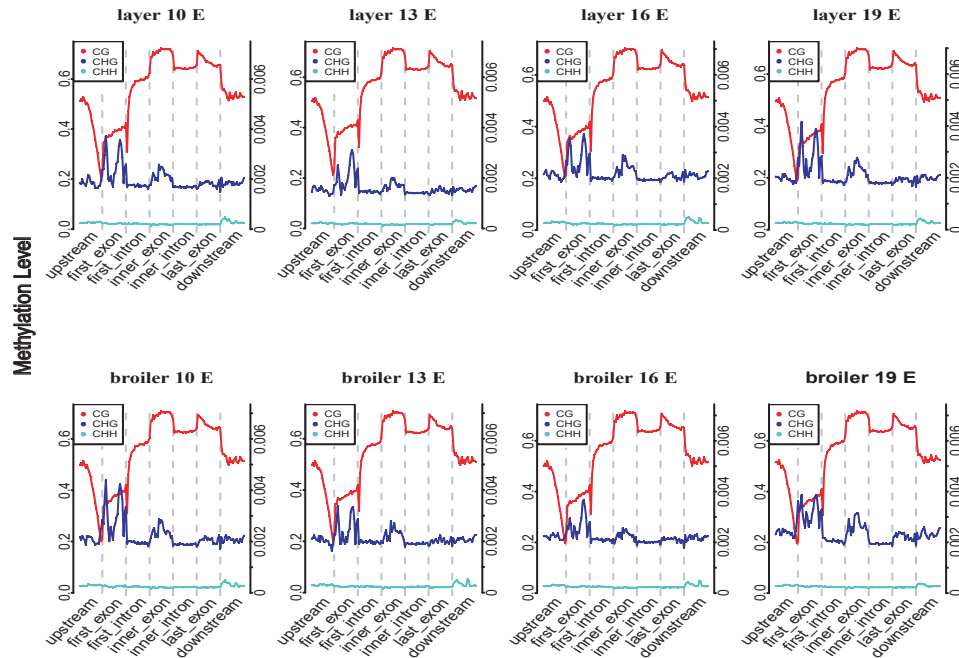

**Fig 2d**

**Methylation Level of of CG/CHG/CHH of Different Gene Elements**

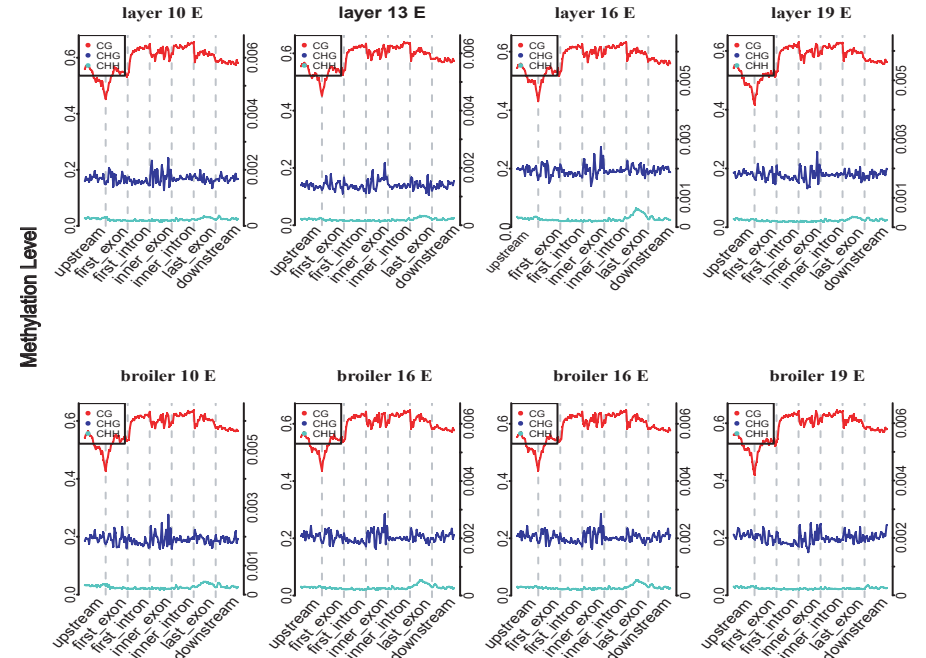

**Fig 3a**

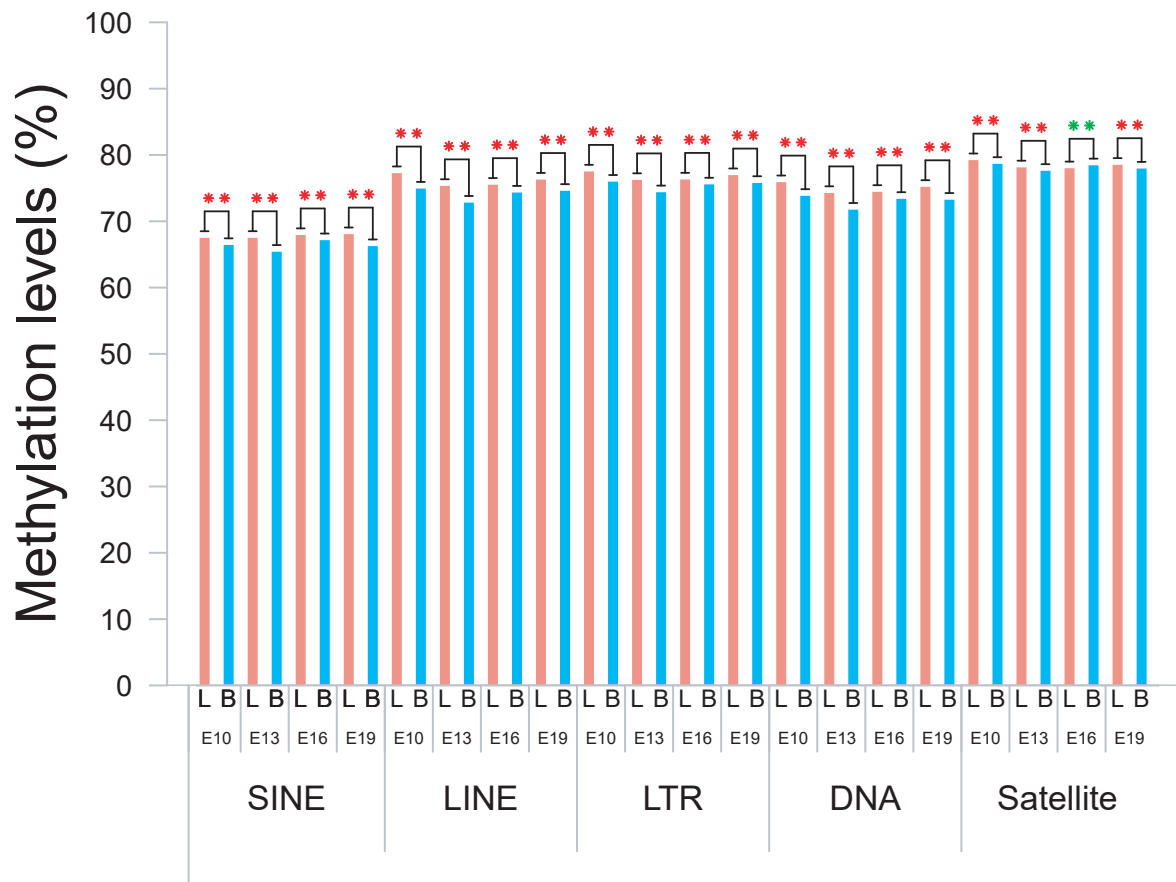

**Fig 3b**

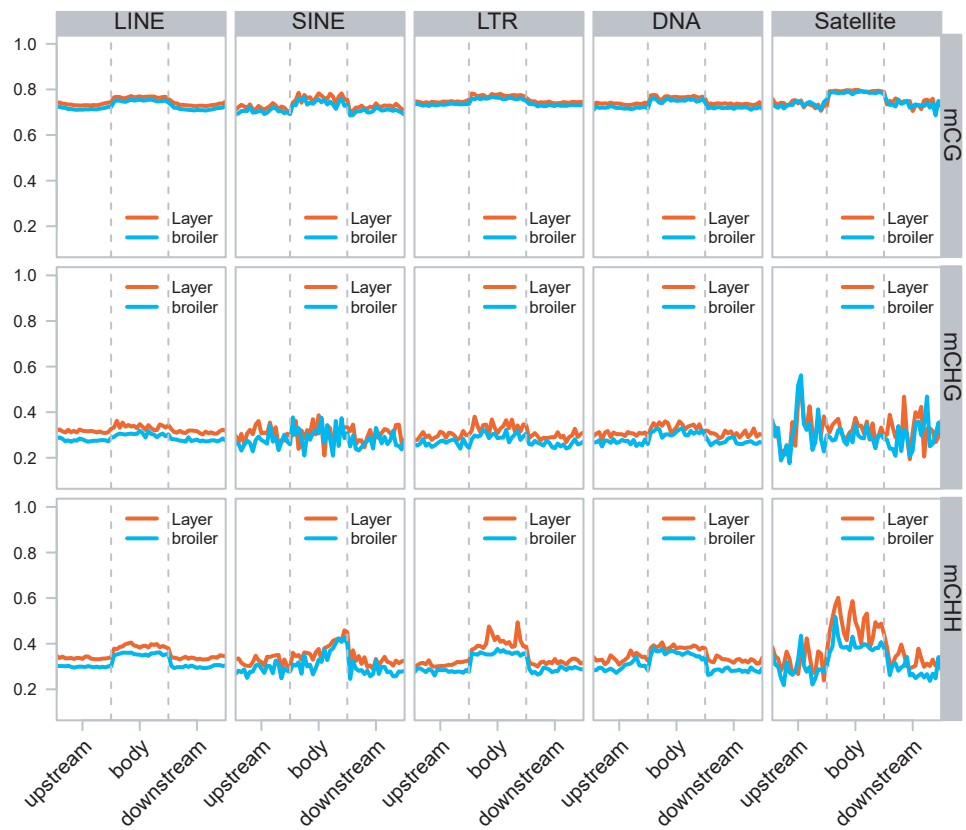



**Fig 4a**

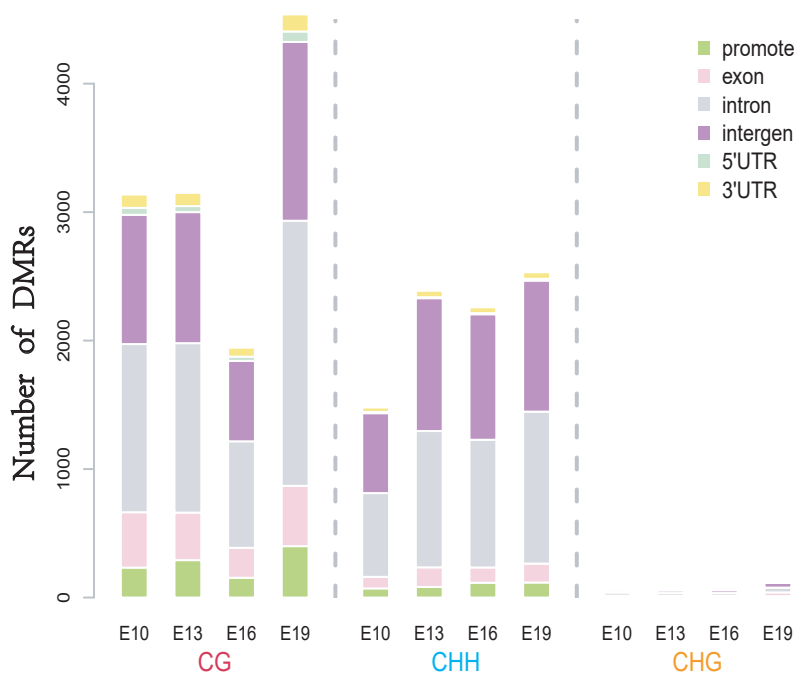

**Fig 4b**

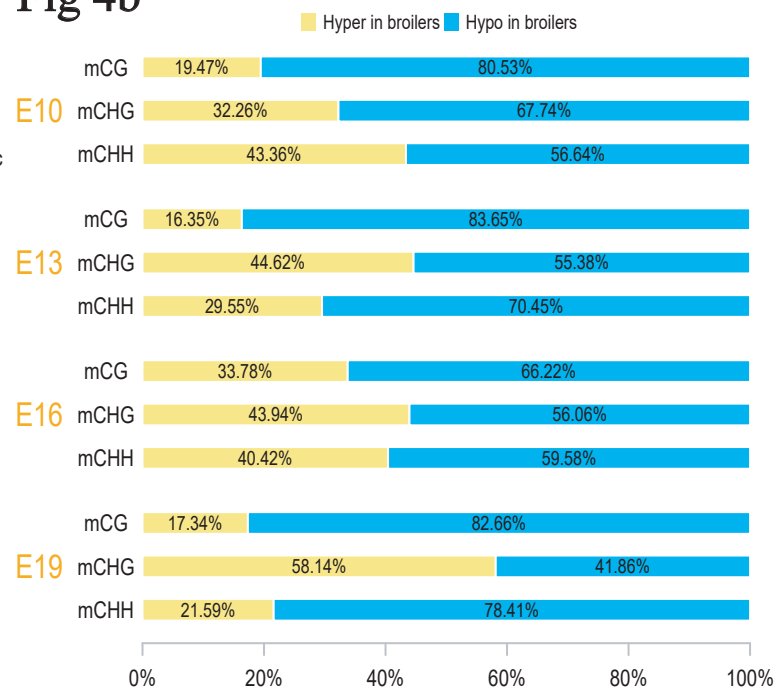

**Fig 4c**

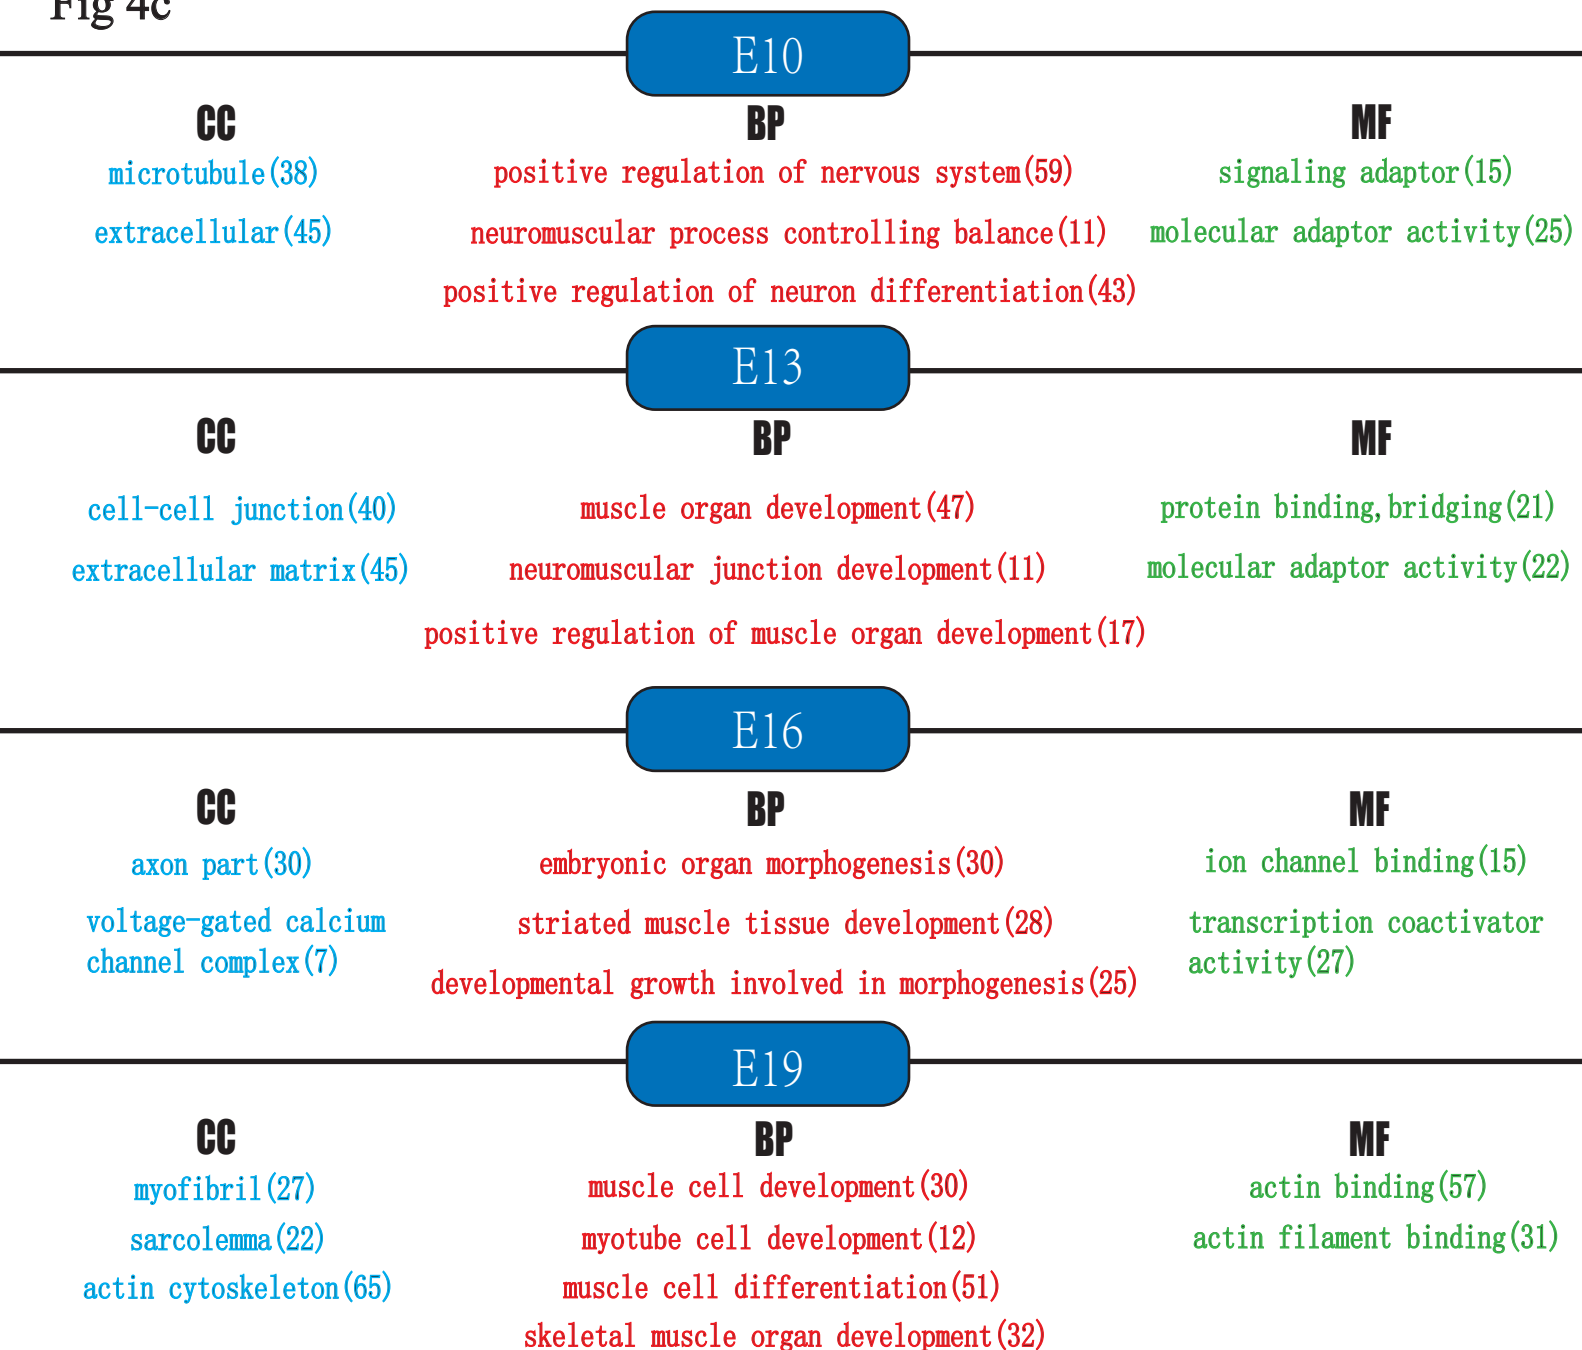

Fig 5a

Heatmap of 24 Samples Using Merged Common DMRs

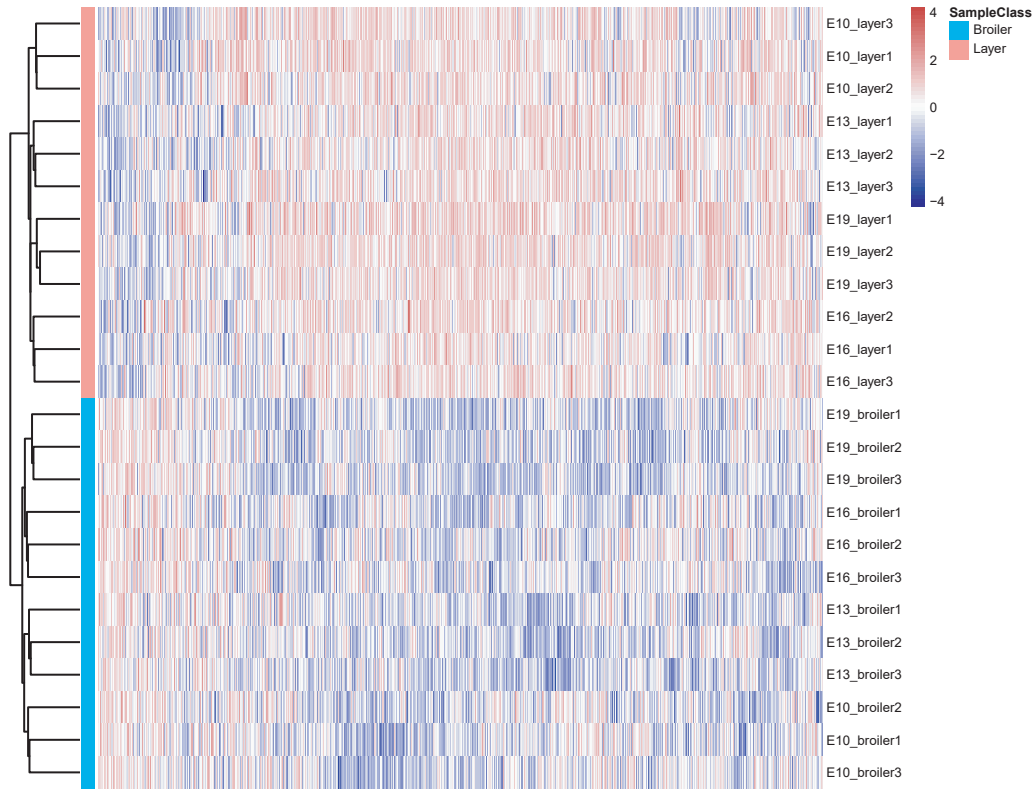

Fig 5b

PCA Of 24 Samples Using Merged Common DMRs

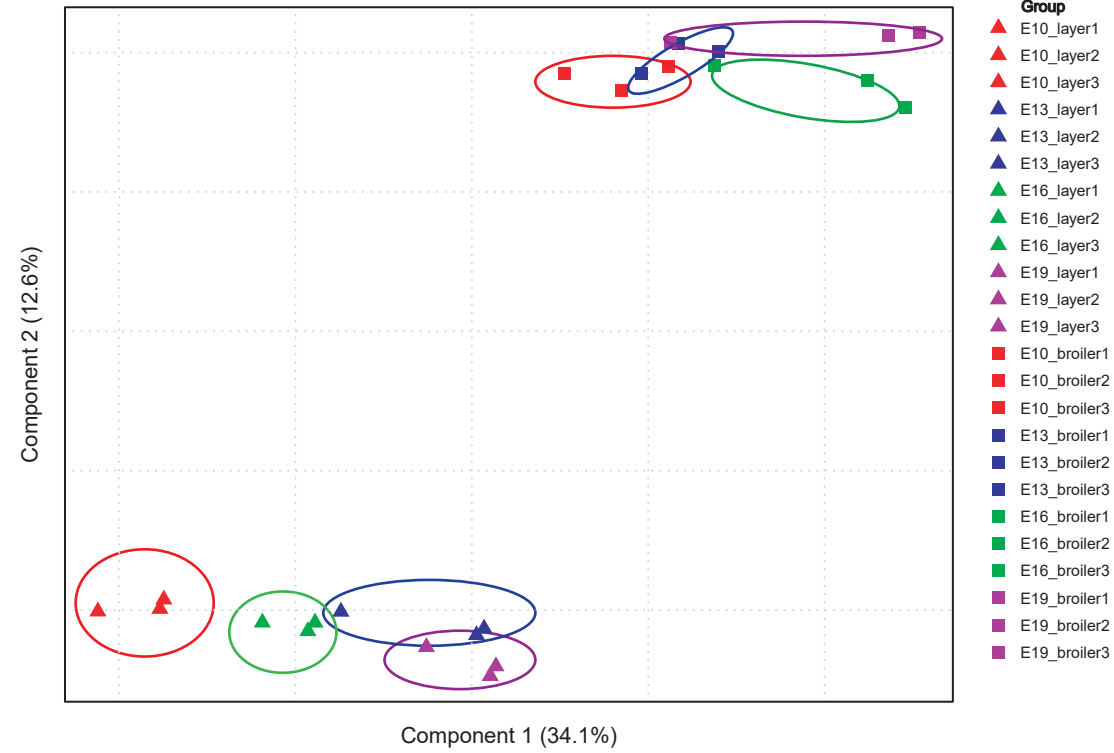

**Fig 6a**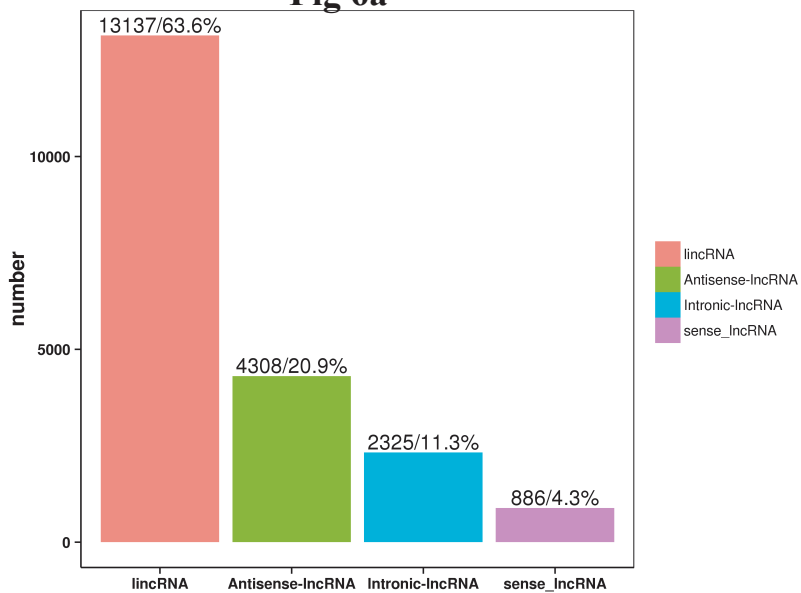**Fig 6b**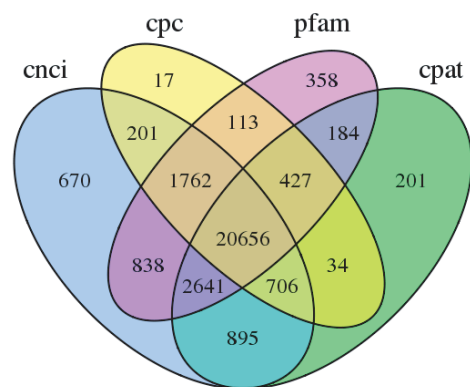**Fig 6c**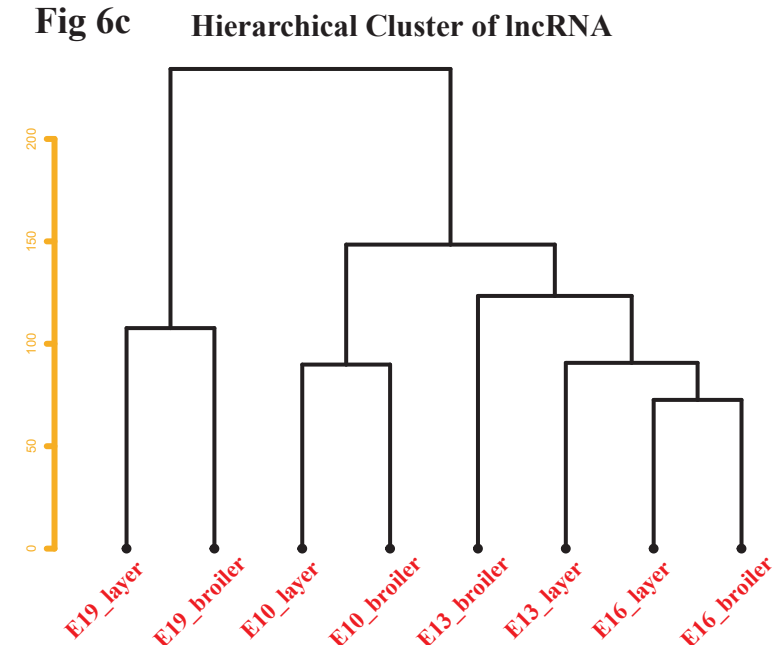**Fig 6d****Methylation level of genes**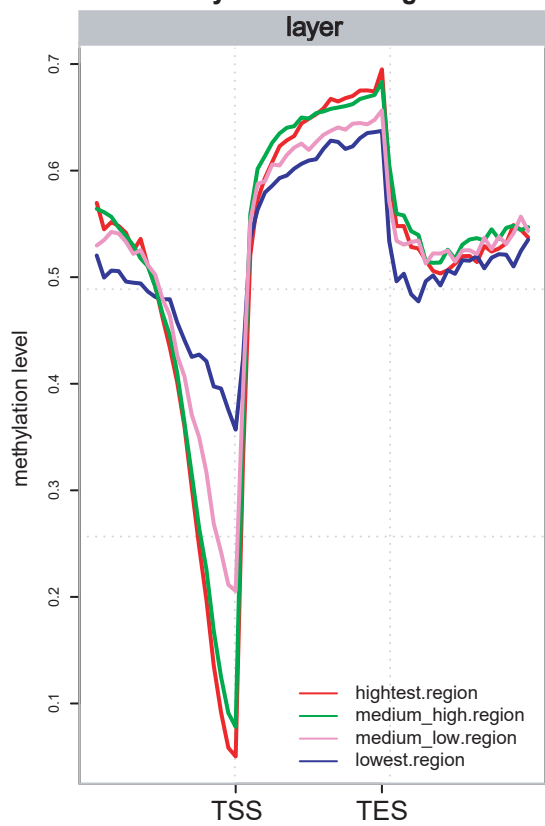**Fig 6e****Methylation level of genes**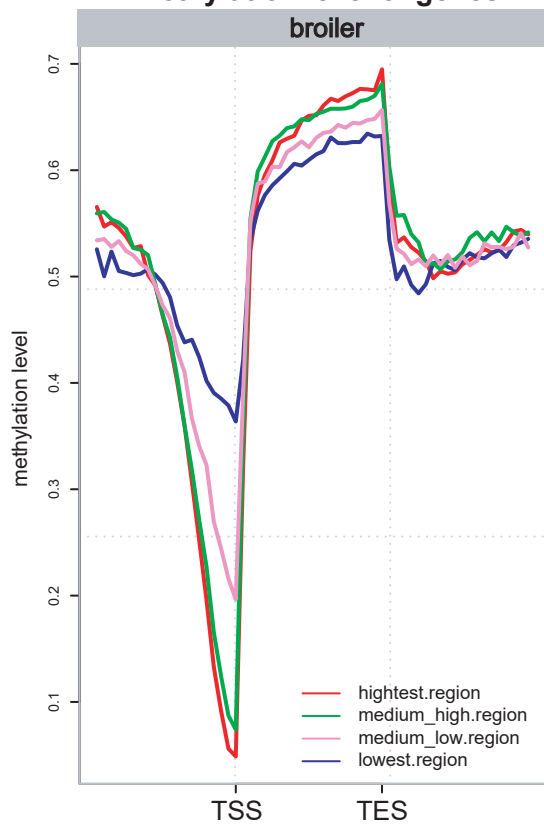**Fig 6f****Methylation level of lincRNAs**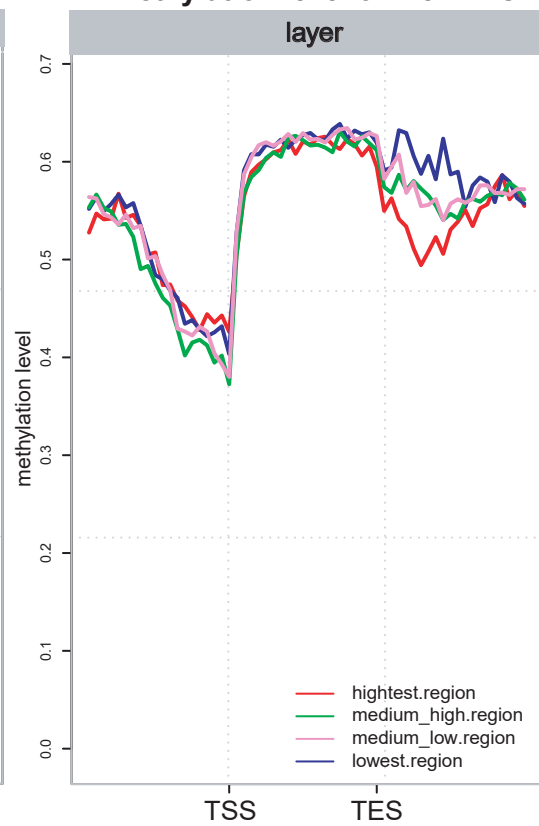**Fig 6g****Methylation level of lincRNAs**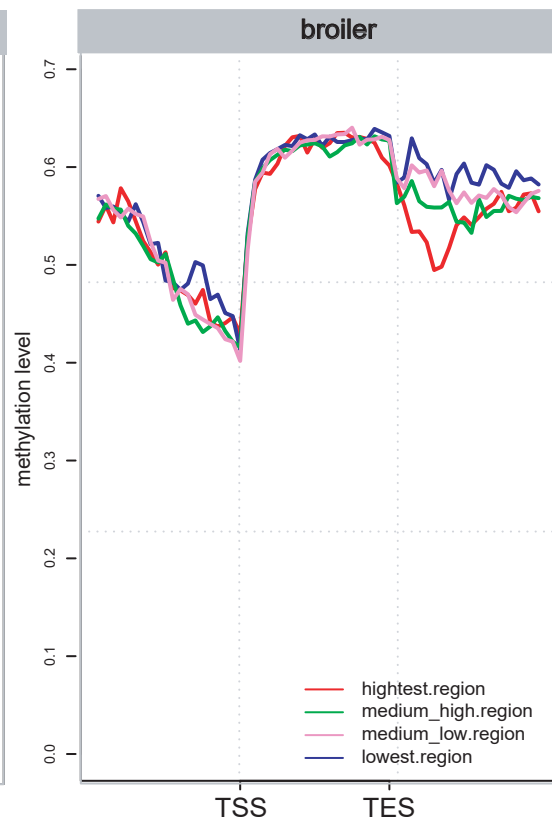

**Fig 7a**

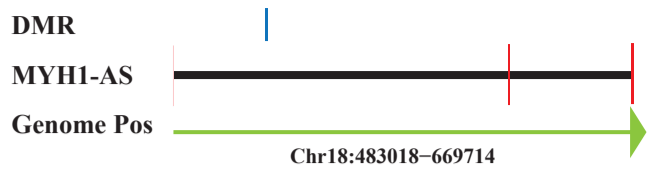

**Fig 7b**

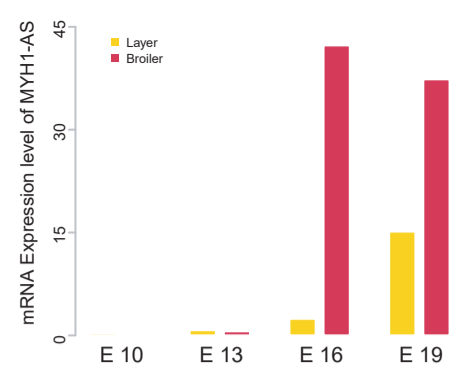

**Fig 7c**

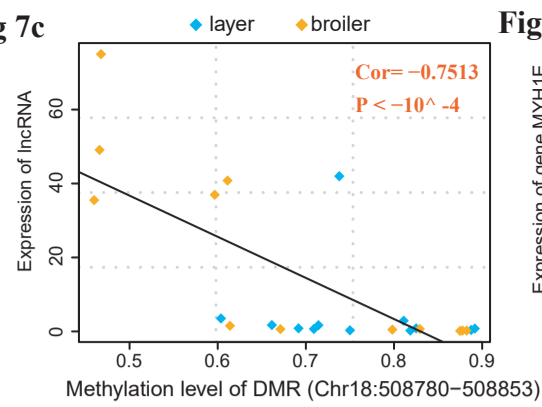

**Fig 7d**

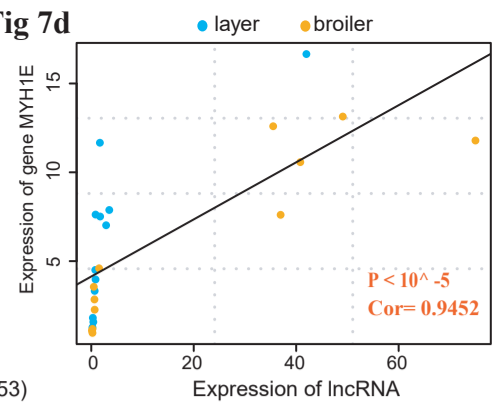

**Fig 7e**

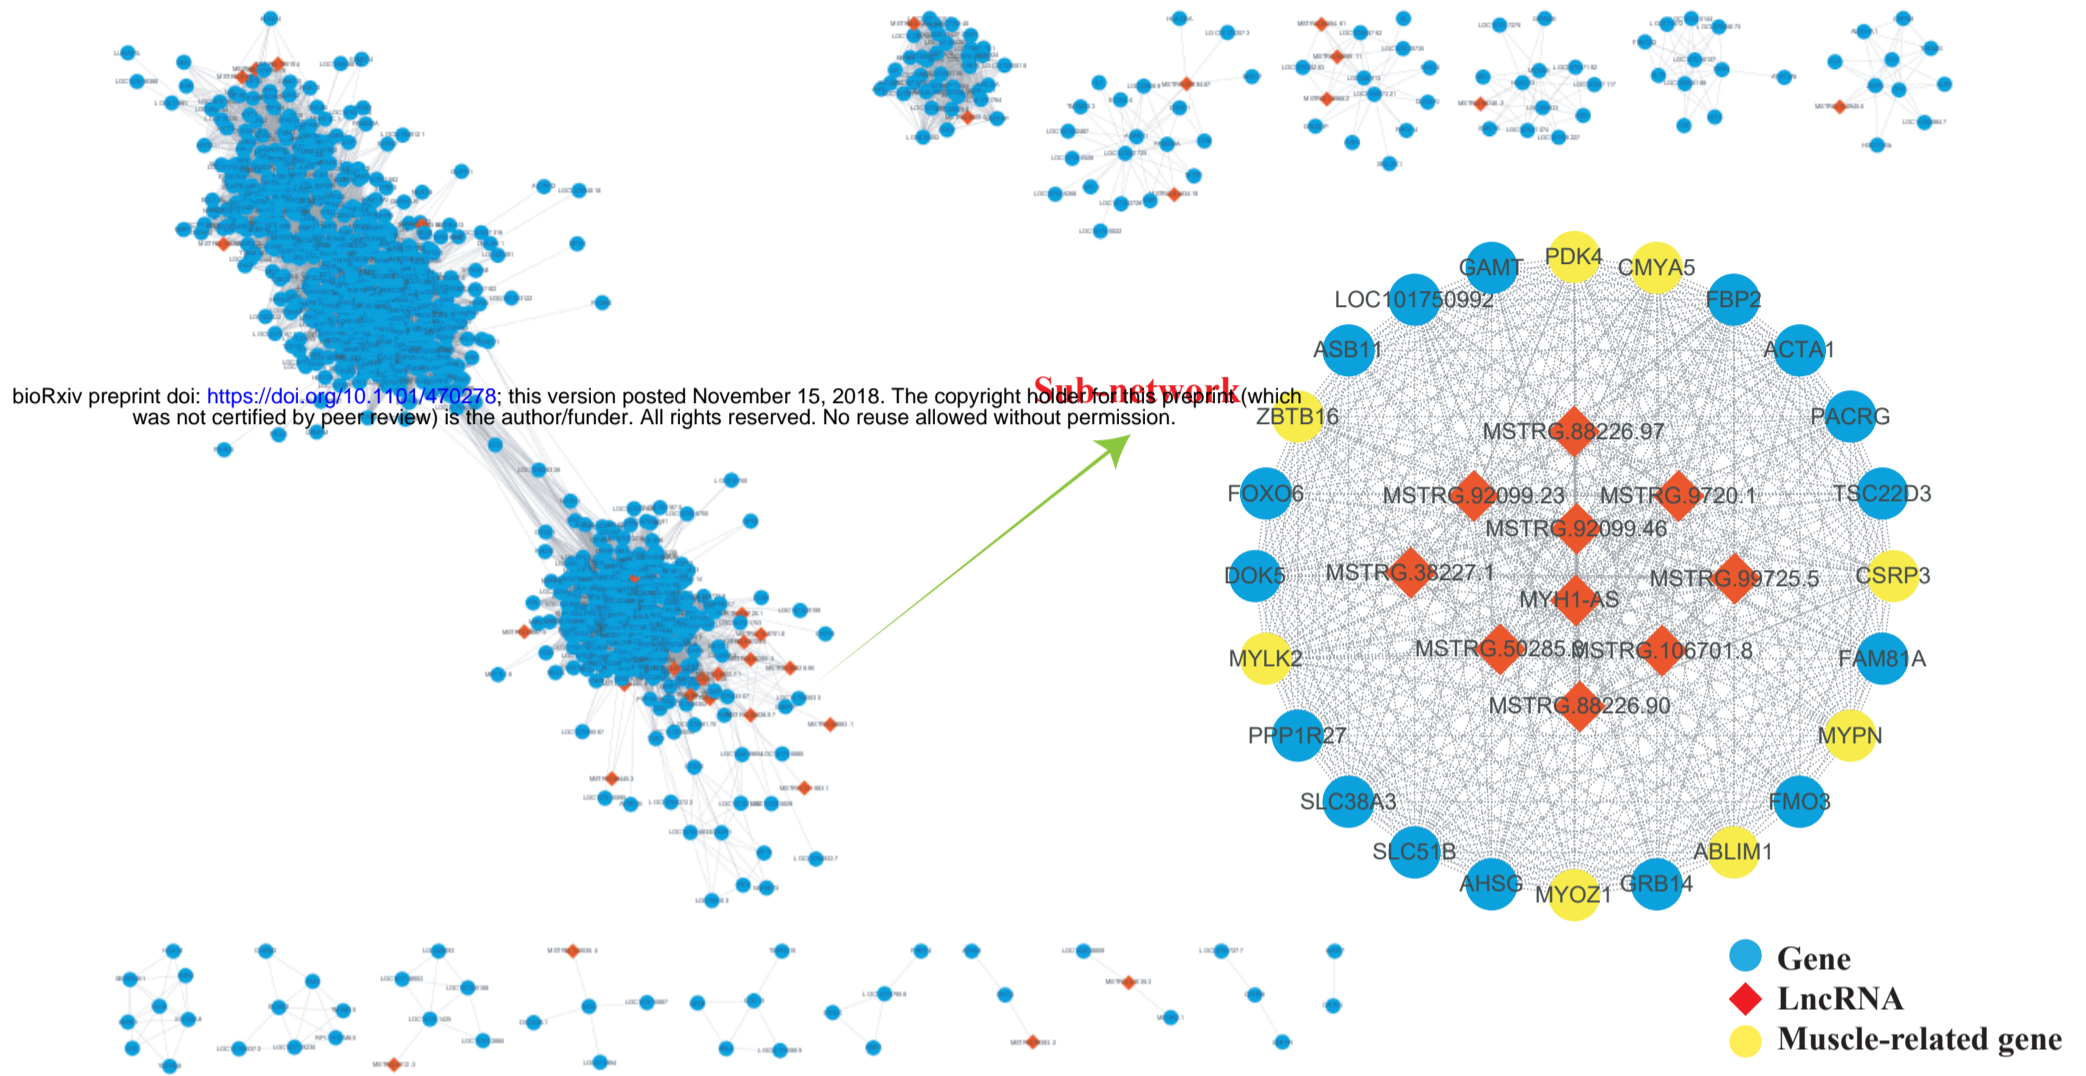

**Fig 7f**

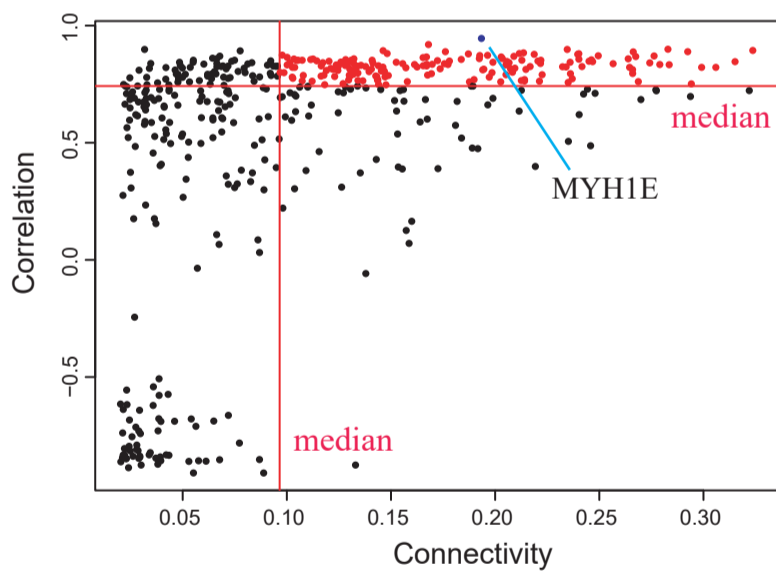

**Fig 7g**

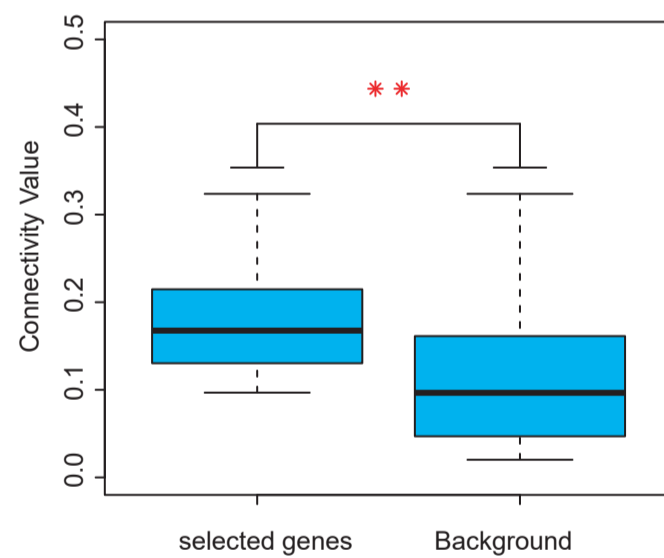

**Fig 7h**

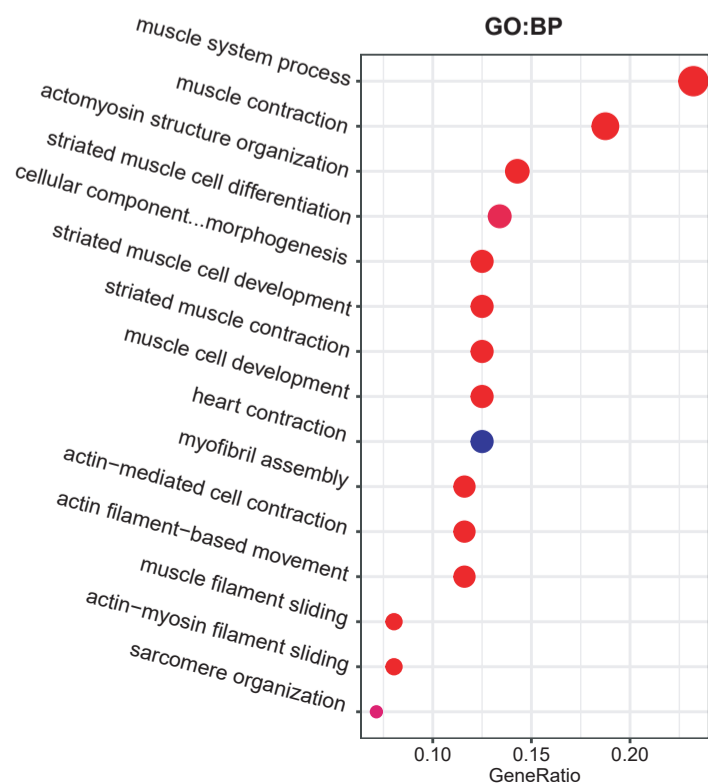

**Fig 7i**

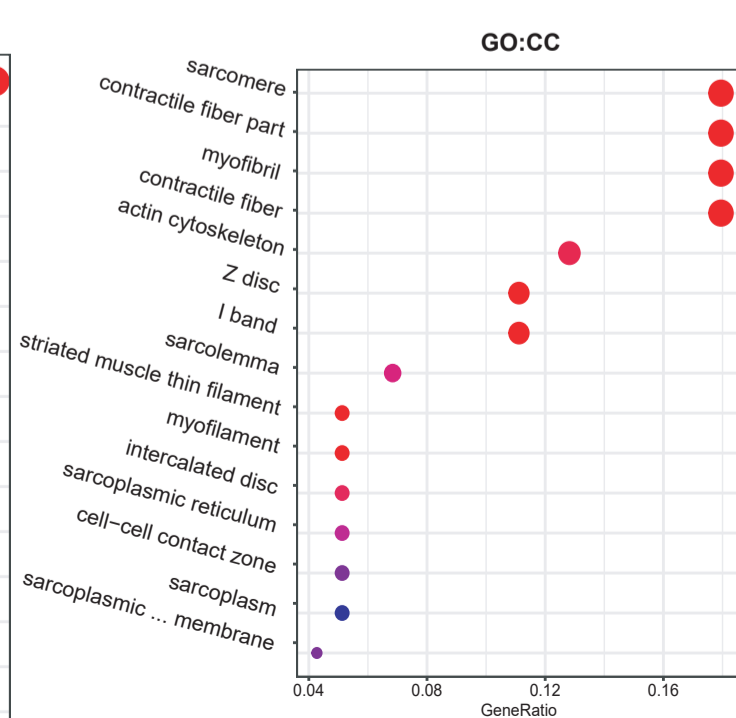

**Fig 7j**

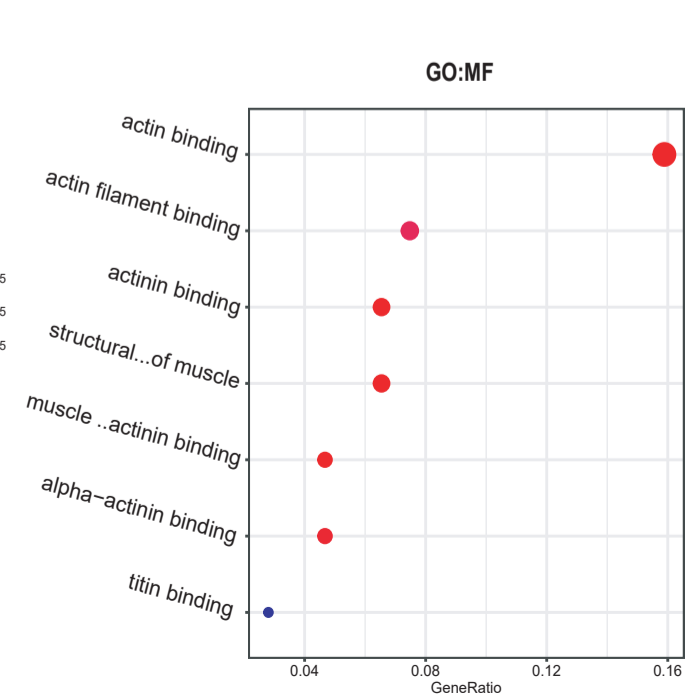

Source: https://www.biorxiv.org/content/biorxiv/early/2018/11/15/470278.1.full.pdf
